# Supplementary material
Source: PubMed Central journal article supplement (PMC6567841)
Supplement: jamaophthalmol-137-669-s001.pdf [file jamaophthalmol-137-669-s001.pdf]

## Supplementary Online Content

Khateb S, Nassisi M, Bujakowska KM, et al. Longitudinal clinical follow-up and genetic spectrum of patients with rod-cone dystrophy associated with mutations in *PDE6A* and *PDE6B*. *JAMA Ophthalmol*. Published online April 18, 2019. doi:10.1001/jamaophthalmol.2018.6367

### eAppendix. Study Details

**eFigure 1.** Conservation of Novel Missense Mutated Amino Acids or Splicing Sites for *PDE6A* and *PDE6B* Genes

**eFigure 2.** Fundus Color, Short-Wavelength (SWAF) and Near-Infrared (NIRAF) Autofluorescence and SD-OCT Horizontal Cross-Section Photos of Patients Harboring Mutations in *PDE6A* and *PDE6B* at Different Ages

**eFigure 3.** Kaplan-Meier Analyses of BCVA of *PDE6A*- and *PDE6B*-Mutated Patients

**eFigure 4.** Serial Measurements of BCVA and VF With Parallel SD-OCT, SWAF and NIRAF Images for CIC04774- *PDE6A* and CIC05351-*PDE6B* Patients

**eFigure 5.** Measurements of Structural Changes

**eFigure 6.** Longitudinal Structural Changes of SD-OCT, SWAF and NIRAF Images of *PDE6A*- and *PDE6B*-Mutated Patients

**eTable 1.** Patients With *PDE6A* Mutations Identified in This Study With In Silico Analysis of the Variants

**eTable 2.** Patients With *PDE6B* Mutations Identified in this Study With In Silico Analysis on Variants

**eTable 3.** List of Mutations Identified in *PDE6A* in Our Cohort

**eTable 4.** List of Mutations Identified in *PDE6B* in Our Cohort

**eTable 5.** Clinical Data of Patients Harboring *PDE6A* Mutations

**eTable 6.** Clinical Data of Patients Harboring *PDE6B* Mutations

**eTable 7.** BCVA, VF and Imaging Data From Both Eyes of the Patients in Both Genetic Cohorts

### eReferences.

This supplementary material has been provided by the authors to give readers additional information about their work.

## eAppendix. Study Details

### Methods

#### Blood samples:

DNA samples incorporated in this study were obtained from the NeuroSensCol DNA bank, for research in neuroscience (PI: JA Sahel, co-PI I Audo, partner with CHNO des Quinze-Vingts, Inserm and CNRS).

#### Mutation analysis:

Validation of putative pathogenic variants and familial segregation were performed using Sanger sequencing (PDE6A, refseq NM\_000440.2 and PDE6B, refseq NM\_000283.3, primers and conditions are available upon request). The frequency of novel mutations in the general population was evaluated using gnomAD (genome aggregation database; <http://gnomad.broadinstitute.org/>) and the pathogenicity of novel missense mutations was predicted using MutationTaster (Mutation Taster; <http://www.mutationtaster.org/>) PolyPhen-2 (Polymorphism Phenotyping; <http://tux.embl-heidelberg.de/ramensky>), SIFT (Sorting Intolerant From Tolerant; <http://sift.jcvi.org/>) and Align GVD (<http://agvgd.iarc.fr/>). Pathogenicity prediction of splicing mutations was performed using Human Splicing Finder (<http://www.umd.be/HSF3/index.html>). The conservation of the mutated amino acids among PDE6A and PDE6B paralogs was verified using UCSC (Genome Browser in Human, GRCh37/hg19; <http://genome.ucsc.edu/cgi-bin/hgBlat>). Conservation was evaluated as previously described (Supplementary data).<sup>1</sup> The conservation of the mutated amino acids among PDE6A and PDE6B paralogs was evaluated as follows: “High” means that the same amino acid is conserved in 100 species; “Moderate” means that the amino acid residue varies less than 5 times among species at this position but is conserved in primates; “Weak” means the amino acid residue varies between 5 to 7 times; if the amino acid residue varies more than 7 times it is qualified as “Not conserved” means that the amino acid residue at the same position changes among primates, but not necessarily with the same amino acid change as the one found in the patient. The guidelines published in the American College of genetics and genomics for classification and variant nomenclature were followed. Variant classification and evidence of pathogenicity were determined based on ACMG Standards and Guidelines (Richards *et al.*, 2015) using <https://www.nature.com/articles/gim201613>.

#### Clinical data:

BCVA was measured at each visit of the patient in the clinic. In case the patient underwent cataract surgery and his/her BCVA improved in the operated eye, measurements prior to surgery that were lower in this eye were corrected to the measurement after surgery with the thought that this better represents foveal function at that time. For statistical analysis we converted all values of BCVA available to logMAR. In order to provide numerical values for low VAs, the following conversions were made: LP (light perception)= 4 (Snellen equivalent 0.0001), HM (hand movement)= 3 (Snellen equivalent: 0.001), FC (finger counting)= 2 (Snellen equivalent: 0.01).<sup>2</sup> Measurements of central Goldmann visual field (VF) for each eye using III1e target and averaged; in addition to binocular VF using III4e target were collected for *PDE6A* and *PDE6B* at different ages during their follow up. Peripheral islands were ignored since they were rare and heterogeneous regarding their shape. Clinically significant cystoid macular edema (CME) or epiretinal membrane (ERM) were defined upon the ophthalmologist's decision. Structural changes were collected for three different modalities: SD-OCT (area of preserved ellipsoid zone (EZ)), SWAF (inner diameter of the hyperautofluorescent ring) and NIRAF (outer diameter hyperautofluorescent ring) (see eFigure 5 in the supplement). The internal boundaries of the SWAF and external boundaries of NIRAF hyperautofluorescent ring in both horizontal and vertical axes were defined as the visible limits seen on FAF. The boundaries of the EZ of SD-OCT sections were determined as the last point the EZ line was observed including the sloped

margins. Follow-up mode Images of 1:1  $\mu\text{m}$  scale were used. Pearson chi-squared test was used to analyze the difference between PDE6A and PDE6B genotypic groups for all categorical variables. Surface calculations were performed using ellipse formula in  $\text{mm}^2$  ( $A=\pi ab$ ).

## Results

### **PDE6A and PDE6B genetic analysis:**

For *PDE6A*, 14 novel mutations were identified including: 5 missense: c.1072A>T p.(Asn358Tyr), c.1724T>C p.(Leu575Pro), c.2125G>A p.(Glu709Lys), c.2366C>T p.(Ser789Phe) and c.2368C>T p.(Arg790Cys) (see Figure 1A in the Supplement); 3 nonsense: c.1351C>T p.(Gln451\*), c.1966G>T p.(Glu656\*), c.2233C>T p.(Gln745\*); 3 1- or 2-bp deletions inducing frameshift: c.823\_824del p.(Tyr275Leufs\*15), c.1236del p.(Phe412Leufs\*12), c.2318\_2319del p.(Gln773Argfs\*5); and 3 splice site changes: c.1065+1G>T, c.1065+2T>A and c.1474-1G>A (see base conservation at these sites in eFigure 1A in the Supplement).

For *PDE6B*, 15 novel mutations were identified including: 8 missense: c.293G>C p.(Arg98Pro), c.409G>A p.(Gly197Arg), c.1614G>C p.(Glu538Asp), c.1726G>A p.(Gly576Ser), c.2045T>C p.(Ile682Thr), c.2152G>T p.(Asp718Trp), c.2215G>A p.(Glu739Lys) and c.2387T>C p.(Met796Thr) (see eFigure 1B in the Supplement); 2 nonsense: c.132C>A p.(Cys44\*), c.181G>T p.(Glu61\*); 2 frameshift: 7-bp insertion: c.797\_798insGGTACTT p.(Tyr267Valfs\*24) and 2-bp deletion with a 1-bp insertion: c.1733\_1734delinsC p.(Leu578Profs\*14); 1 stop loss: c.2565A>G p.(\*855Trpext\*30); and 2 splice site changes: c.1257+1G>A, c.1468-1G>A (see base conservation at these sites in eFigure 1B in the Supplement). Of note, one affected subject (CIC07171) was found harboring a complex allele with c.2125G>A (exon 17) and c.2368C>T (exon 21) being of maternal inheritance. Another subject, CIC00133, was found to harbor two homozygous mutations: c.1614G>C p.(Glu538Asp) that is predicted to be pathogenic and c.1401+4\_1401+48del which was excluded from being pathogenic despite previous reports<sup>50</sup> due to extremely high prevalence of homozygous mutations among European population based on gnomAD database (rs778367741, 0.0569 allele frequency including 177 homozygous/124960 alleles).

Of note, despite the fact that the identified novel missense variations are predicted to be pathogenic according to the different bioinformatics prediction tools and moderately to highly conserved among different species, but due to the lack of *in vivo* functional analysis their significance is still uncertain.

### **Agreement between eyes: visual acuity and visual field**

BCVA, on at least one visit, was available for all patients with *PDE6A* mutations while BCVA was missing for 1 affected subject with *PDE6B* mutation (brother of CIC08050) (2.9%). Follow-up period for BCVA measurement, ranged 0-42 years for *PDE6A*- and 0-28 years for *PDE6B*-mutated patients. Follow-up distribution of periods is detailed in Table 1. .

Among all patients, all subjects carrying *PDE6A* mutations and 29/35 subjects carrying *PDE6B* mutations had at least one visit with a VF performed for both eyes. Among them, 10 *PDE6A* and 11 *PDE6B* subjects had at least one follow-up visit with VF data available.

No substantial differences were found between both eyes in both genetic groups for both BCVA and VF. These data are presented with mean differences  $\pm$  95% confidence interval in the e-table 7.

**Structural findings:**

Cystic changes were present on SD-OCT in both eyes in 31.5% of *PDE6A* and 28.12% of *PDE6B*-mutated patients ranging from subtle to clinically significant cysts requiring treatment. Epiretinal membrane (ERM) was present in 31.57% of *PDE6A* and 31.25% of *PDE6B*-mutated patients ( $P=0.980$ ) but none of the cases manifested with significant vitreo-macular traction and impacted on BCVA except one *PDE6B*-mutated patient (CIC03134) with macular hole (MH) on the RE resulting severe BCVA loss compared to the LE ( $P=0.794$ ) (Table 1, eFigure 2, eTables 5 and 6).

**Longitudinal multimodal imaging changes:**

Longitudinal measurements of horizontal and vertical diameter for the three different modalities: SD-OCT (area of preserved ellipsoid zone (EZ)), SWAF (inner diameter of the hyperautofluorescent ring) and NIRAF (outer diameter hyperautofluorescent ring) were collected. The areas of preserved EZ, hyperautofluorescent SWAF ring and NIRAF were calculated using the diameter measurements and ellipse formula (eFigure 6C in the Supplement).

Neither visual acuity nor visual field surface values correlated with the EZ, SWAF and NIRAF measurements. Despite the significant decrease in the measurements of about one third from baseline during follow-up, BCVA and VF did not evolve in parallel as shown for two representative cases: subject CIC09174- *PDE6A* and CIC05351- *PDE6B* in eFigure 4 in the Supplement.

**eFigure 1. Conservation of Novel Missense Mutated Amino Acids or Splicing Sites for *PDE6A* (A) and *PDE6B* (B) Genes.** The mutated amino acid/nucleotide is in blue, with flanking five amino acids. Replaced amino acid (Red) and protein position are indicated superiorly. Nucleotides are indicated in lowercase.

| <b>A</b>     |  | 358                            | 575                           | 709                           | 789                            |
|--------------|--|--------------------------------|-------------------------------|-------------------------------|--------------------------------|
|              |  | Y                              | P                             | K                             | F                              |
| Human        |  | NGLIC <b>N</b> IMNAP           | TMFSL <b>L</b> V <b>T</b> GKL | EQTR <b>K</b> EIVMAM          | VYKE <b>F</b> SRFH <b>E</b> EE |
| Rhesus       |  | NGLIC <b>N</b> IMNAP           | TMFSL <b>L</b> V <b>T</b> GKL | EQTR <b>K</b> EIVMAM          | VYKE <b>F</b> SRFH <b>K</b> E  |
| Mouse        |  | NGLIC <b>N</b> IMNAP           | TMFSL <b>L</b> V <b>T</b> GKL | EQTR <b>K</b> EIVMAM          | VYKE <b>F</b> SRFH <b>E</b> EE |
| Dog          |  | NGLIC <b>N</b> IMNAP           | TMFSL <b>L</b> V <b>T</b> GKL | EQTR <b>K</b> EIVMAM          | VYKE <b>F</b> SRFH <b>E</b> EE |
| Elephant     |  | NGLIC <b>N</b> IMNAP           | TMFSL <b>L</b> V <b>T</b> GKL | EQTR <b>K</b> EIVMAM          | VYKE <b>F</b> SRFH <b>E</b> EE |
| Opossum      |  | NGLIC <b>N</b> IMNAS           | TMFSL <b>L</b> MTGKL          | EQTR <b>K</b> EIVTAM          | VYKE <b>F</b> SRFH <b>E</b> EQ |
| X_Tropicalis |  | NGLIC <b>N</b> IMNTS           | TMFT <b>L</b> LMTGNL          | EQTR <b>K</b> EIVMAM          | VYKE <b>F</b> SRFH <b>P</b> E  |
| Zebrafish    |  | SGFIC <b>N</b> IMNAA           | TMFT <b>L</b> LTTGKL          | ETTR <b>K</b> EIVMAM          | VYKE <b>F</b> SRFH <b>P</b> E  |
|              |  | 790                            | 1065+2T>A 1065+1G>T           | 1474-1G>A                     |                                |
|              |  | C                              |                               |                               |                                |
| Human        |  | YKE <b>F</b> SRFH <b>E</b> EEI | actt <b>a</b> c <b>L</b> GNQA | PLEAQ <b>c</b> tgtat          |                                |
| Rhesus       |  | YKE <b>F</b> SRFH <b>K</b> EI  | actt <b>a</b> c <b>L</b> GNQA | PLEAQ <b>c</b> tgtat          |                                |
| Mouse        |  | YKE <b>F</b> SRFH <b>E</b> EEI | actt <b>a</b> c <b>L</b> GNQA | PLEGQ <b>c</b> tgcag          |                                |
| Dog          |  | YKE <b>F</b> SRFH <b>E</b> EEI | actt <b>a</b> c <b>L</b> GNQA | PLEGQ <b>c</b> tgtgt          |                                |
| Elephant     |  | YKE <b>F</b> SRFH <b>E</b> EEI | actt <b>a</b> c <b>L</b> GNQA | PLEEQ <b>c</b> tgtag          |                                |
| Opossum      |  | YKE <b>F</b> SRFH <b>E</b> QI  | actc <b>a</b> c <b>L</b> GNQA | PLEEQ <b>c</b> tgaag          |                                |
| X_Tropicalis |  | YKE <b>F</b> SRFH <b>P</b> EI  | actt <b>a</b> c <b>L</b> GNEA | PLEEQ <b>c</b> tgcaa          |                                |
| Zebrafish    |  | YKE <b>F</b> SRFH <b>P</b> EI  | actt <b>a</b> c <b>F</b> GSEA | -LEKK <b>c</b> tgtat          |                                |
| <b>B</b>     |  | 98                             | 137                           | 538                           | 576                            |
|              |  | P                              | R                             | D                             | S                              |
| Human        |  | SLFMY <b>R</b> Q <b>R</b> NGV  | FPLD <b>I</b> GVVGHV          | FQIPQ <b>E</b> VLVRF          | TLLMT <b>G</b> KLKSY           |
| Rhesus       |  | SLFMY <b>R</b> Q <b>R</b> NGV  | FPLD <b>I</b> GVVGHV          | FQIPQ <b>E</b> VLVRF          | TLLMT <b>G</b> KLKSY           |
| Mouse        |  | SLFMY <b>R</b> Q <b>R</b> NGI  | FPLD <b>I</b> GIVGHV          | FQIPQ <b>E</b> VLVRF          | TLLMT <b>G</b> KLKSY           |
| Dog          |  | SLFMY <b>R</b> Q <b>R</b> NGV  | FPLD <b>I</b> GVVGHV          | FQIPQ <b>E</b> VLVRF          | TLLTT <b>G</b> KLKSY           |
| Opossum      |  | SLFMY <b>R</b> Q <b>R</b> NGI  | YPLD <b>I</b> GVIGHV          | FQIPQ <b>E</b> VLVRF          | TLLMT <b>G</b> KLKSY           |
| X_Tropical   |  | SLFMY <b>R</b> Q <b>R</b> NGT  | YPLD <b>I</b> GIVGHV          | FQVP <b>P</b> EALVRF          | TLLMT <b>G</b> KLKRY           |
| Zebrafish    |  | SLFMY <b>R</b> Q <b>R</b> NGI  | YPLDT <b>G</b> IIVGHV         | FHIP <b>R</b> E <b>T</b> LVRF | TLLMT <b>G</b> DLKRY           |
|              |  | 682                            | 718                           | 739                           | 796                            |
|              |  | T                              | Y                             | L                             | L                              |
| Human        |  | AMFQ <b>K</b> IVDESK           | MMTAC <b>D</b> LSAIT          | LLVAA <b>E</b> FWEQG          | EEIL <b>P</b> MFDR <b>L</b> Q  |
| Rhesus       |  | AMFQ <b>K</b> IVDESK           | MMTAC <b>D</b> LSAIT          | LLVAA <b>E</b> FWEQG          | EEIL <b>P</b> MFDR <b>L</b> Q  |
| Mouse        |  | TMFQ <b>K</b> IVDESK           | MMTAC <b>D</b> LSAIT          | LLVAA <b>E</b> FWEQG          | EEIL <b>P</b> MFDR <b>L</b> Q  |
| Dog          |  | TMFQ <b>K</b> IVDESK           | -----                         | LLVAA <b>E</b> FWEQG          | EEIL <b>P</b> MFDR <b>L</b> Q  |
| Opossum      |  | TMFQ <b>K</b> IVDESK           | MMTAC <b>D</b> LSAIT          | LLVAA <b>E</b> FWEQG          | EEIQ <b>P</b> MFDR <b>L</b> Q  |
| X_Tropical   |  | TMFQ <b>K</b> IVDQSK           | MMTAC <b>D</b> LSAIT          | LLVAA <b>E</b> FWEQG          | EEIQ <b>P</b> MLD <b>G</b> LL  |
| Zebrafish    |  | TMFQ <b>K</b> IVDQSK           | MMTAC <b>D</b> LSAIA          | LSVAA <b>E</b> FWEQG          | VEIT <b>P</b> MLER <b>L</b> L  |
|              |  | 1257+1G>A                      | 1468-1G>A                     |                               |                                |
| Human        |  | EVLME <b>g</b> taagc           | ccacag <b>g</b> KEELP         |                               |                                |
| Rhesus       |  | EVLME <b>g</b> taagc           | ccacag <b>g</b> KEELP         |                               |                                |
| Mouse        |  | EVLME <b>g</b> taaat           | ttacag <b>g</b> KEELP         |                               |                                |
| Dog          |  | EVLME <b>g</b> taaaa-          | ccacag <b>g</b> KEVLP         |                               |                                |
| Opossum      |  | ETLME <b>g</b> taagt           | ccttag <b>g</b> KDEL <b>P</b> |                               |                                |
| X_Tropical   |  | ETLME <b>g</b> taag-           | ccacag <b>g</b> KQVLP         |                               |                                |
| Zebrafish    |  | ETLME <b>g</b> t----           | ctata <b>g</b> NEVLP          |                               |                                |

**eFigure 2. Fundus Color, Short-Wavelength (SWAF) and Near-Infrared (NIRAF) Autofluorescence and SD-OCT Horizontal Cross-Section Photos of Patients Harboring Mutations in *PDE6A* And *PDE6B* at Different Ages. (A-X) *PDE6A*: (A-D) CIC04617, 19 year-old (YO); (E-H) CIC9174, 27 YO; (I-L) CIC6762, 34 YO; (M-P) CIC00570, 43 YO; (Q-T) CIC04495, 52 YO; (U-X) CIC7195, 65 YO); (Aa-Ax) *PDE6B*: (Aa-Ad) CIC6472, 14 YO; (Ae-Ah) CIC8795, 24 YO; (Ai-Al) CIC5351, 36 YO; (Am-Ap) CIC04006, 45 YO; (Aq-At) CIC00195, 52 YO; (Au-Ax) CIC7427, 58 YO). (A, E, I, M, Q, U, Aa, Ae, Ai, Am, Aq, Au) Color fundus photos showing peripheral retinal atrophy encroaching the fovea combined with BSPs seen outside the temporal vascular arcades. Waxy pallor of the optic nerve and narrowed retinal vessels are seen in advanced ages. (B, F, J, N, R, V, Ab, Af, Aj, An, Ar, Av) Corresponding SWAF photos demonstrating parafoveal hyper-autofluorescent ring indicating the border of EZ abnormalities. Heterogeneous hypo-autofluorescent patches and dots can be seen within the fovea and perifovea of some patients reflecting outer retinal changes. The atrophic mid- and far- periphery appears as hypo-autofluorescence. (C, G, K, O, S, W, Ac, Ag, Ak, Ao, As, Aw) Corresponding NIRAF shows constriction of hyper-autofluorescent fovea in advanced ages, surrounded by hypo-autofluorescent atrophic retina. (D, H, L, P, T, X, Ad, Ah, Al, Ap, At, Ax) Horizontal SD-OCT cross-sections passing through the fovea show preservation of the foveal hyper-reflective bands surrounded by thinned outer retinal structures (i.e. outer nuclear layer (ONL) and ellipsoid and inter-digitation zones). (H, Ah, Al, Ap) show various hypo-reflective cysts in the ONL. (D, T, X, Ad, Ah, Ax) show thin epiretinal membrane (ERM). All the previously mentioned findings are similar between *PDE6A* and *PDE6B*-mutated patients at the different disease stages.**

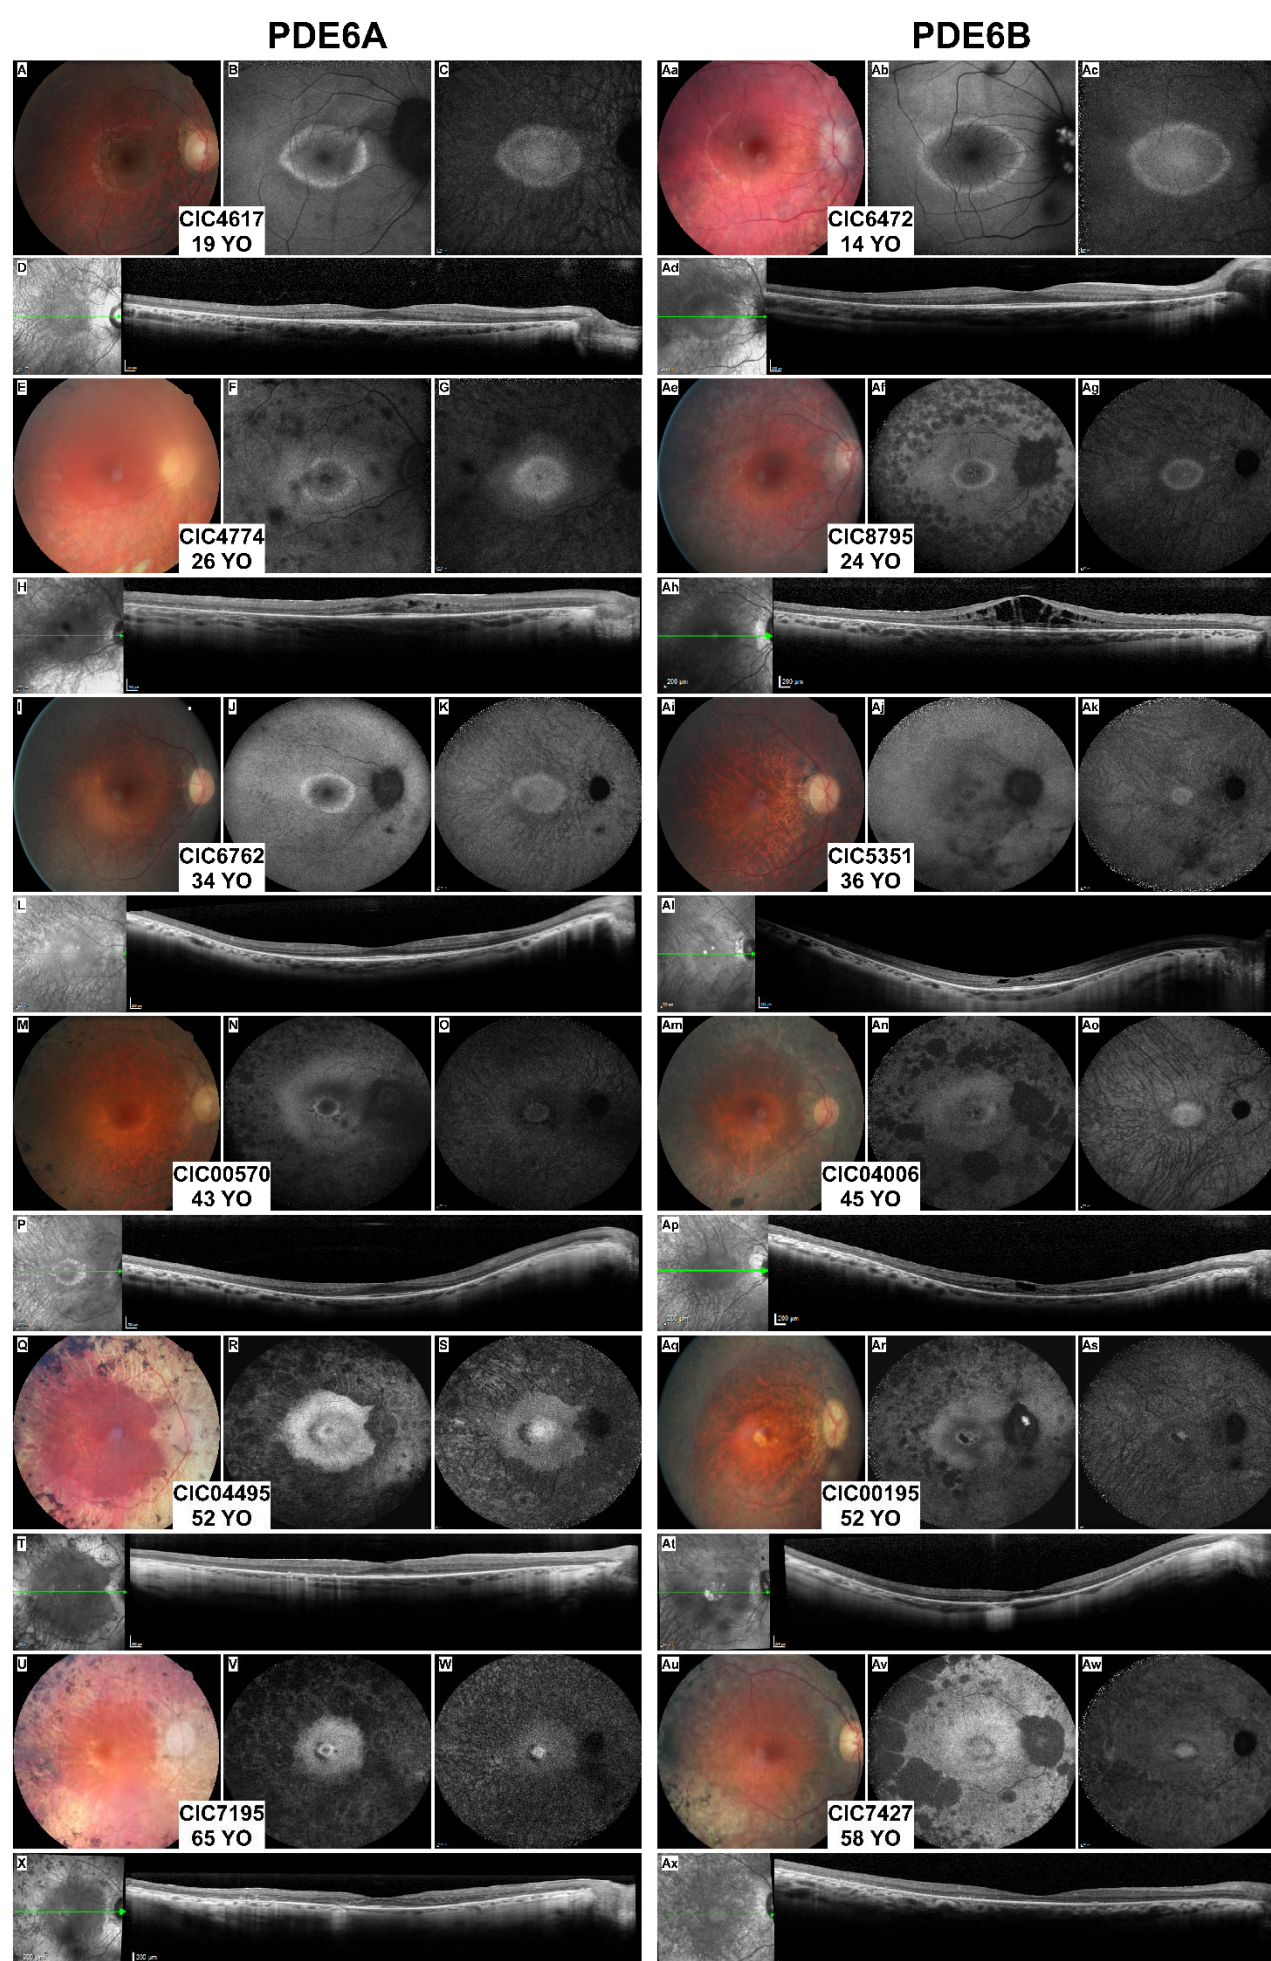

**eFigure 3. Kaplan-Meier Analyses of BCVA of PDE6A- and PDE6B-Mutated Patients.** LogMAR BCVA Kaplan-Meier analysis for  $BCVA_{00} > 0.52$  versus follow-up for PDE6A- and PDE6B-mutated patients. Dashes in the survival table at the bottom of the figure represent missing data.

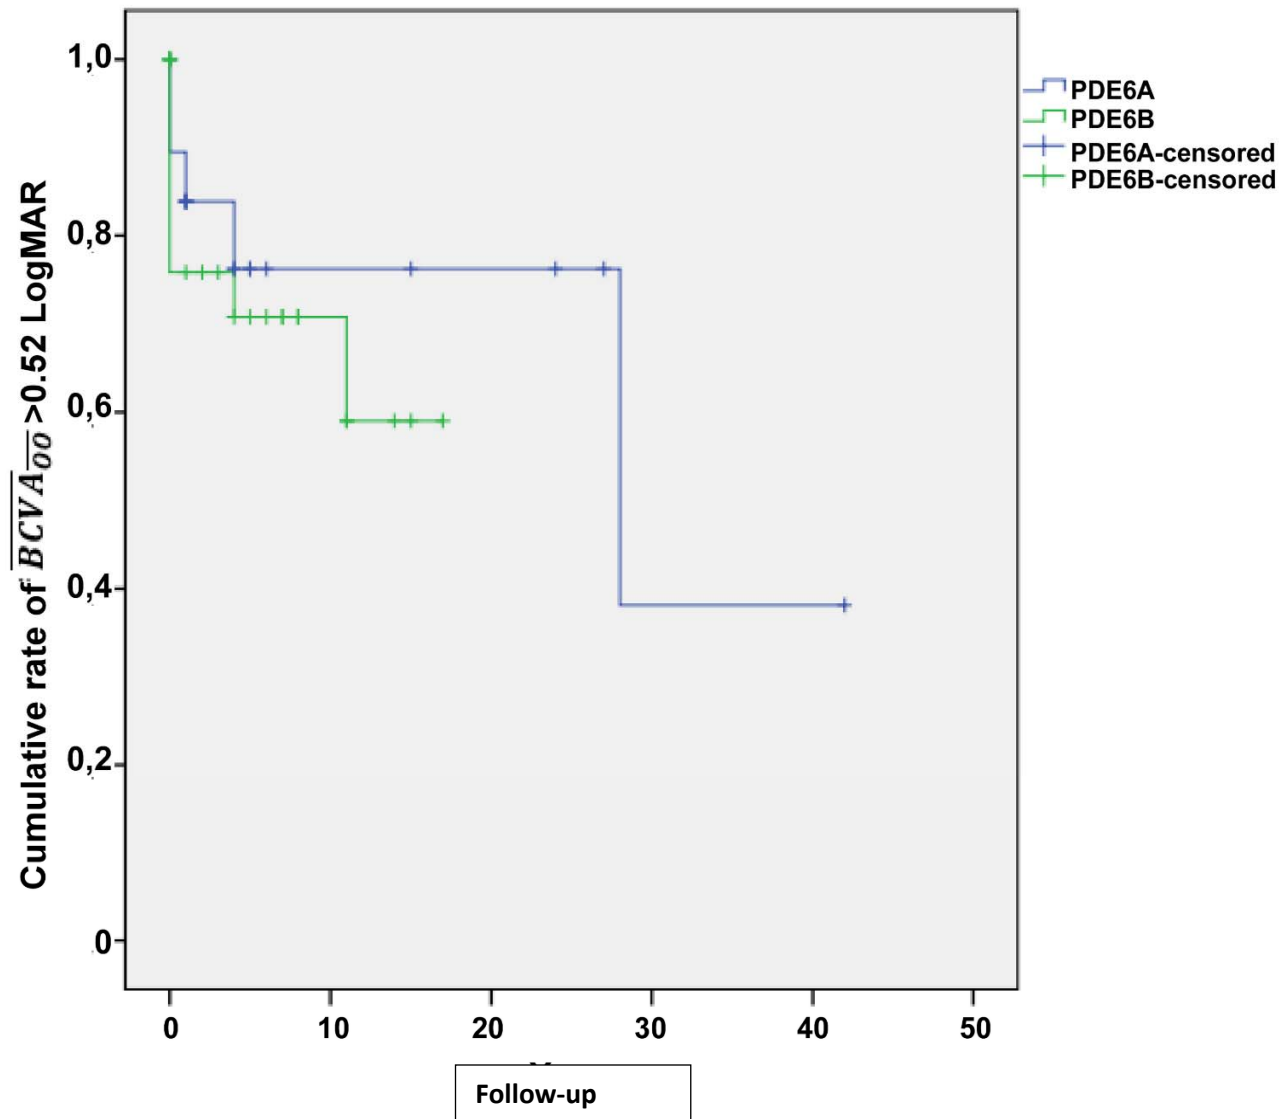

| TIME           | 0  | 1  | 2  | 3  | 4  | 5  | 6  | 7  | 8 | 10 | 11 | 14 | 15 | 17 | 24 | 27 | 28 | 42 |  |
|----------------|----|----|----|----|----|----|----|----|---|----|----|----|----|----|----|----|----|----|--|
| <b>PDE6A</b>   |    |    |    |    |    |    |    |    |   |    |    |    |    |    |    |    |    |    |  |
| # Eyes at risk | 19 | 16 | -  | -  | 11 | 8  | 6  | -  | - | -  | -  | -  | 5  | -  | 4  | 3  | 2  | 1  |  |
| # Events       | 2  | 1  | -  | -  | 1  | 0  | 0  | -  | - | -  | -  | -  | 0  | -  | 0  | 0  | 1  | 0  |  |
| # Censored     | 1  | 4  | -  | -  | 2  | 2  | 1  | -  | - | -  | -  | -  | 1  | -  | 1  | 1  | 0  | 1  |  |
| <b>PDE6B</b>   |    |    |    |    |    |    |    |    |   |    |    |    |    |    |    |    |    |    |  |
| # Eyes at risk | 29 | 18 | 17 | 16 | 15 | 13 | 12 | 11 | 9 | -  | 6  | 3  | 2  | 1  | -  | -  | -  | -  |  |
| # Events       | 7  | 0  | 0  | 0  | 1  | 0  | 0  | 0  | 0 | -  | 1  | 0  | 0  | 0  | -  | -  | -  | -  |  |
| # Censored     | 4  | 1  | 1  | 1  | 1  | 1  | 1  | 2  | 3 | -  | 2  | 1  | 1  | 1  | -  | -  | -  | -  |  |

**eFigure 4. Serial Measurements of BCVA and VF With Parallel SD-OCT, SWAF and NIRAF Images for (A) CIC04774- *PDE6A* and (B) CIC05351-*PDE6B* Patients.** Regular constriction of the EZ preservation, hyper autofluorescent SWAF ring and NIRAF ellipse did not correlate to BCVA and VF measurement.

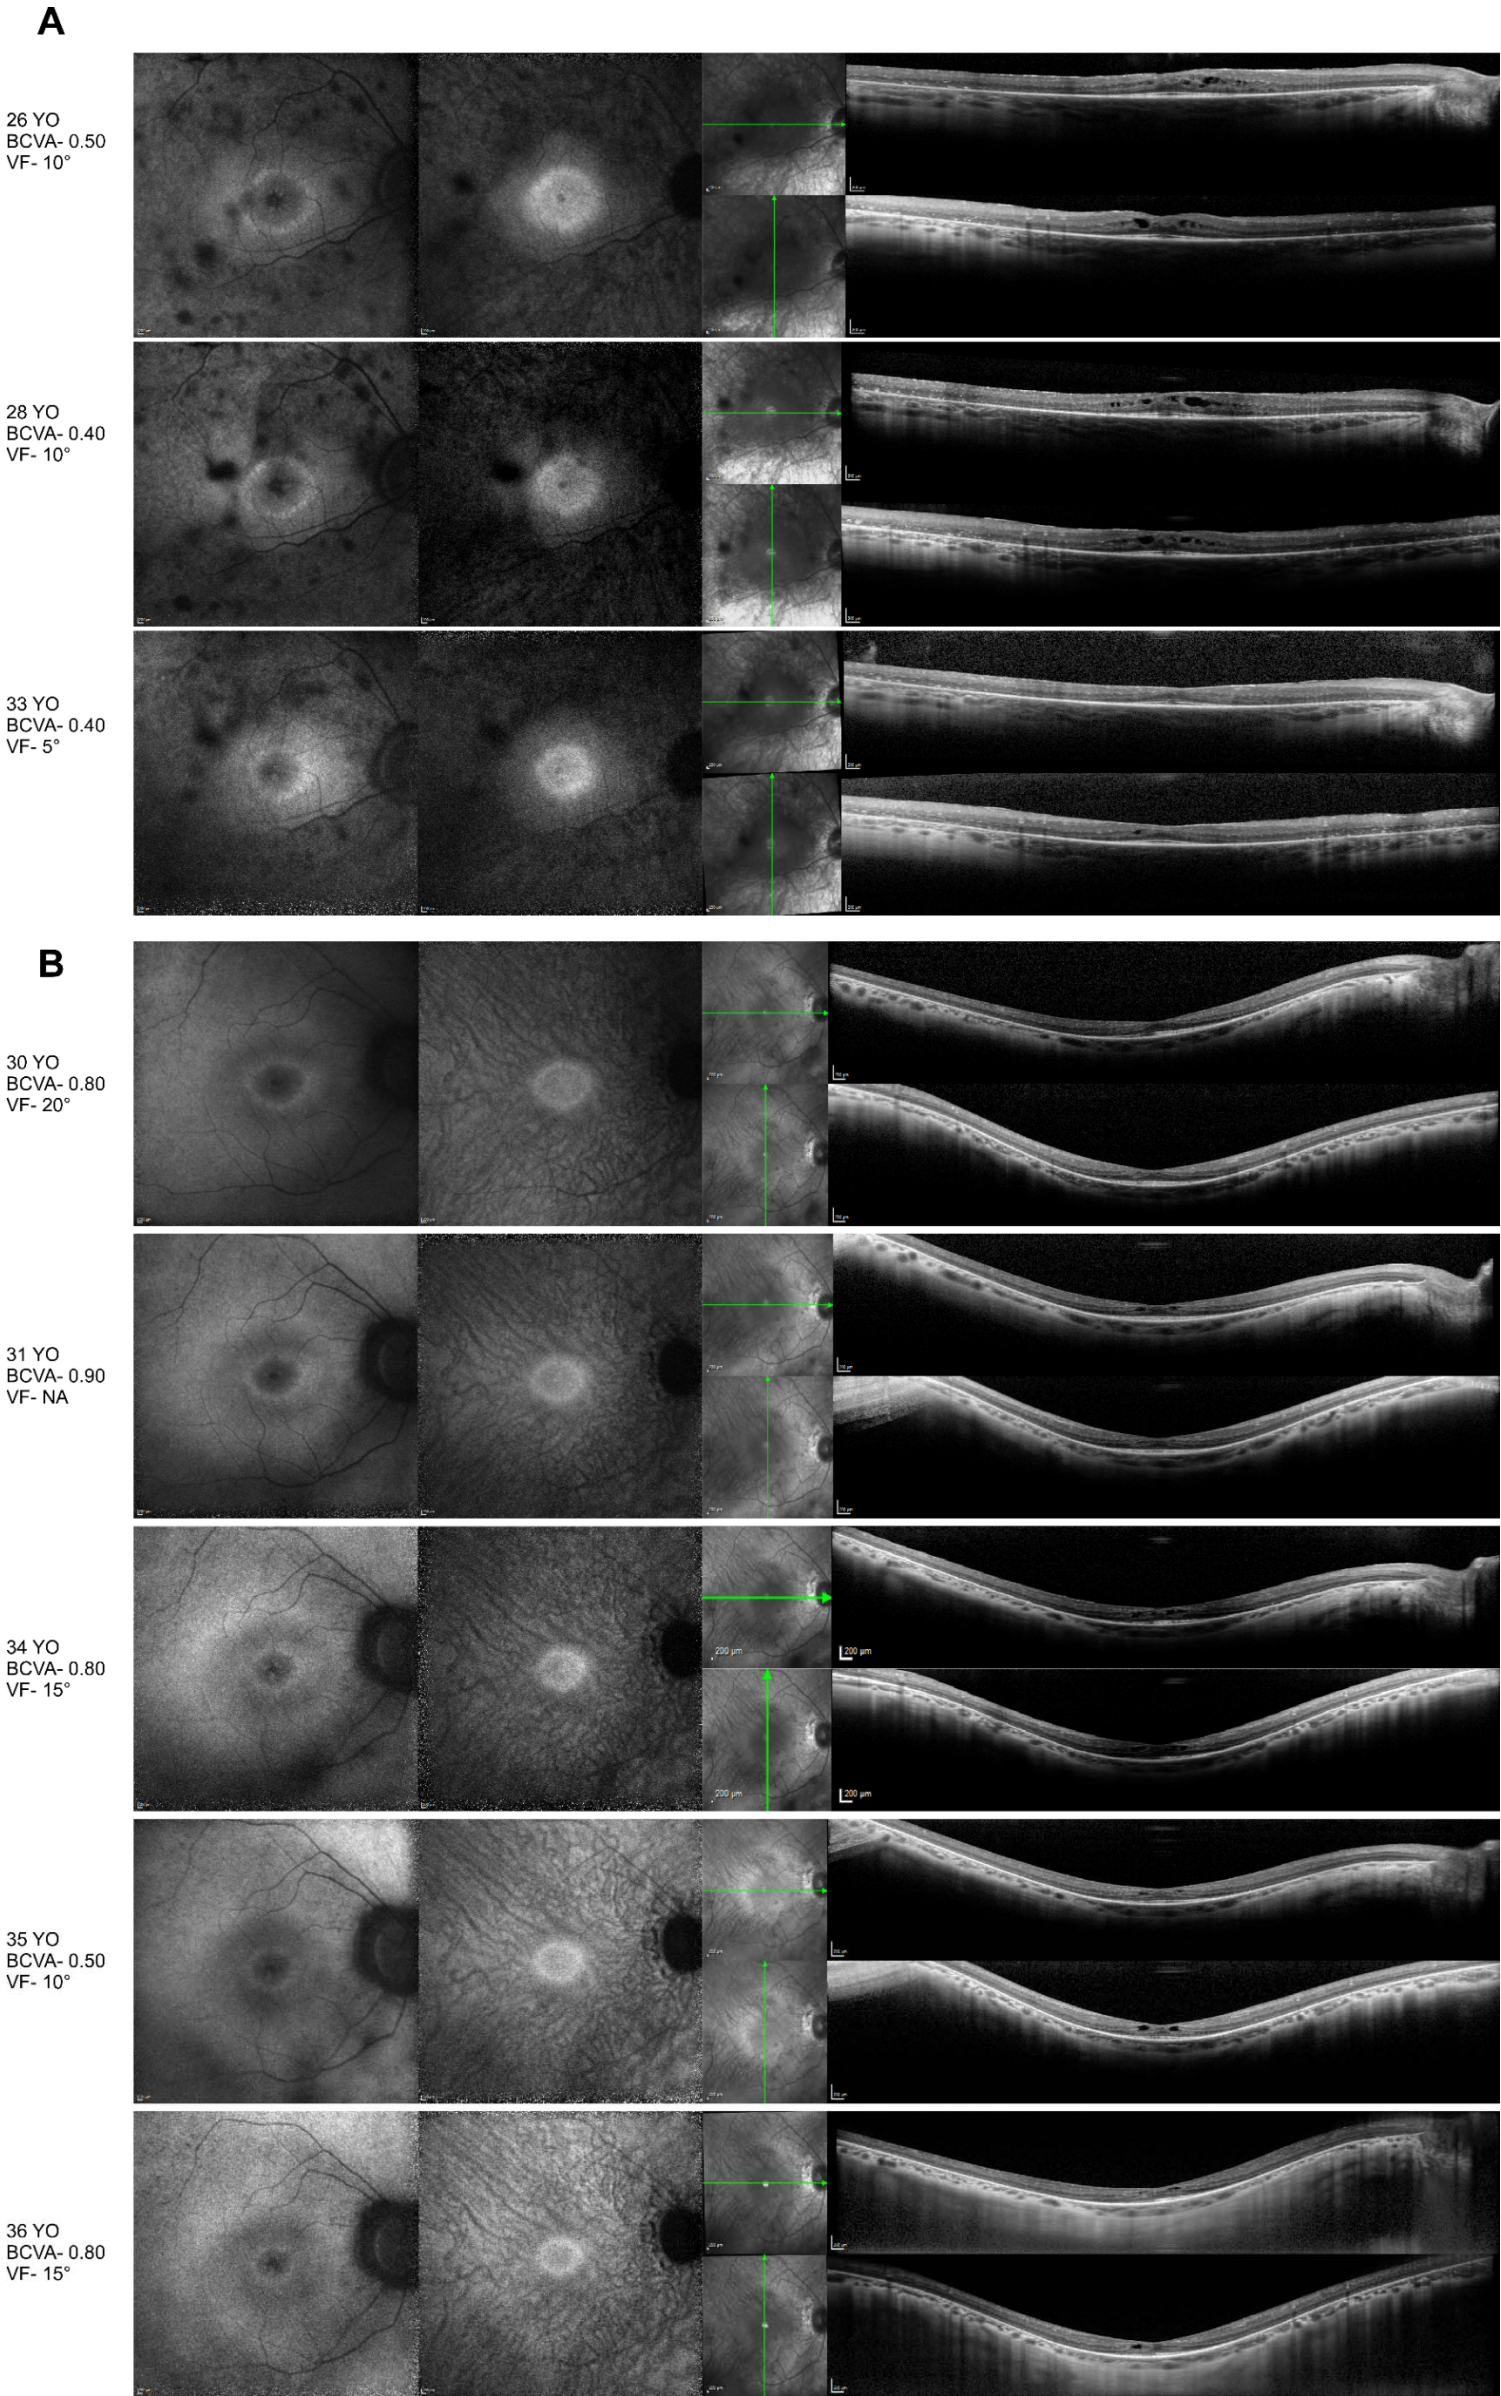



**eFigure 5. Measurements of Structural Changes.** (A) SD-OCT, (B) SWAF and (C) NIRAF images with overlays in yellow show the measurements technique of the structural changes.

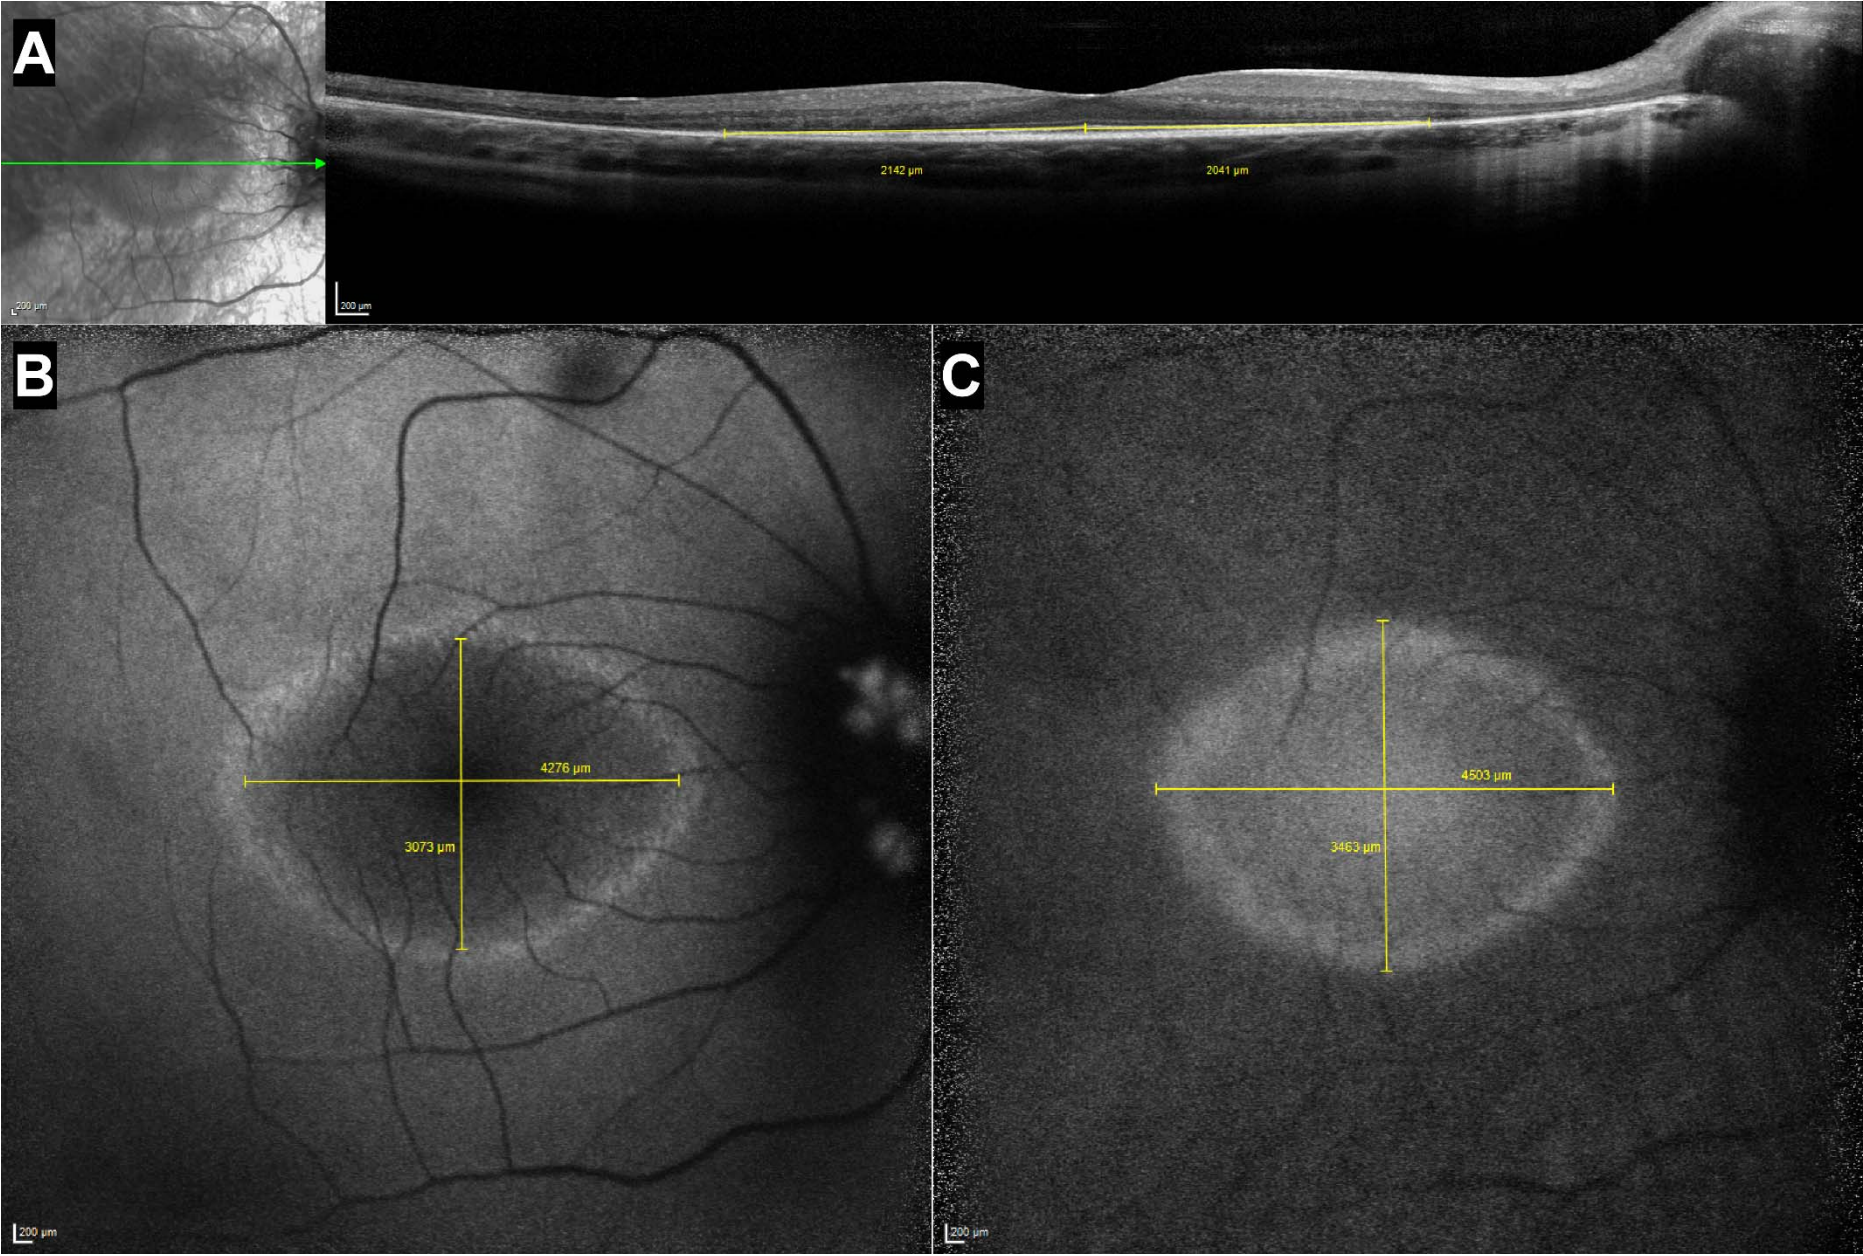

**eFigure 6. Longitudinal Structural Changes of SD-OCT, SWAF and NIRAF Images of *PDE6A*- and *PDE6B*-Mutated Patients.** (A) Horizontal and (B) vertical diameter versus age showing linear constriction with age progression. Trend lines, slope formula and R<sup>2</sup> ratio are shown for each parameter. (C) Calculated area of parafoveal ring versus age declining in similar linear pattern for SD-OCT, SWAF and NIRAF in both groups of patients. Trend lines, slope formula and R<sup>2</sup> ratio are shown for each parameter.

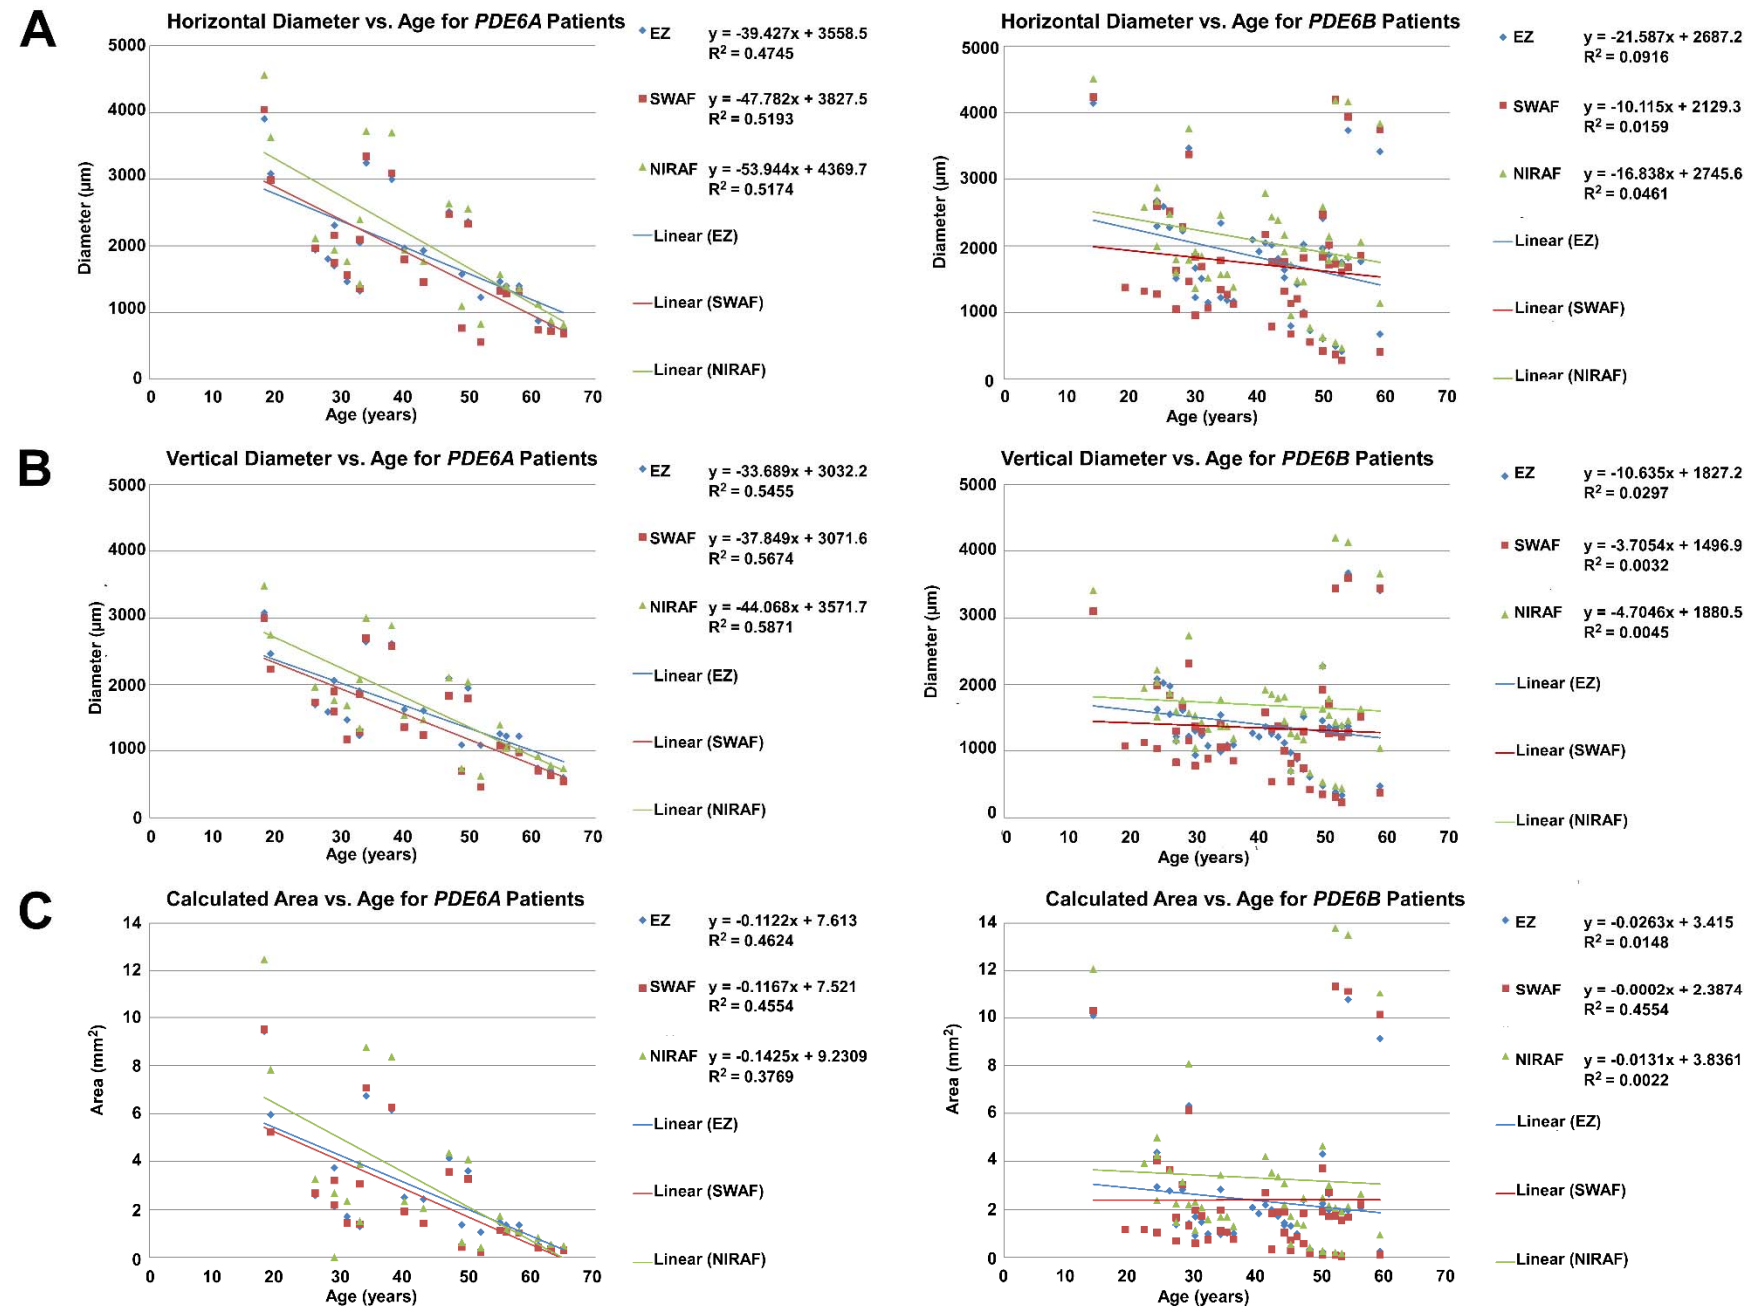

**eTable 1. Patients With *PDE6A* Mutations Identified in This Study With *In Silico* Analysis of the Variants.**

| Family Number | Patient Number | Exon/ Intron | Mutation at cDNA Level | Mutation at Protein Level | Pathogenic prediction by PolyPhen-2 SIFT MutationTaster Align GVD | MAF                    | Protein Domain Involved / Putative Functional Consequence | Reference | Familial Segregation possible                                                                                 |
|---------------|----------------|--------------|------------------------|---------------------------|-------------------------------------------------------------------|------------------------|-----------------------------------------------------------|-----------|---------------------------------------------------------------------------------------------------------------|
| F217          | CIC003 18      | 21           | hom<br>c.2366C>T       | p.(Ser789Phe)             | Probably damaging<br>Tolerated<br>Disease causing<br>C0           | 0                      | C-terminus                                                | novel     | yes<br>mother - het<br>c.2366C>T<br>p.(Ser789Phe)                                                             |
| F339          | CIC004 96      | 4            | het<br>c.823_824del    | p.(Tyr275Leufs*15)        | NA                                                                | 0                      | GAF2                                                      | novel     | yes<br>father – het c.1236del<br>p.(Phe412Leufs*12)<br><br>mother - het<br>c.823_824del<br>p.(Tyr275Leufs*15) |
|               |                | 9            | het c.1236del          | p.(Phe412Leufs*12)        | NA                                                                | 0                      | GAF2                                                      | novel     |                                                                                                               |
| F383          | CIC005 70      | 1            | het<br>c.304C>A        | p.(Arg102Ser)             | Probably damaging<br>Deleterious<br>Disease causing<br>C0         | 0.0001516<br>never hom | GAF1                                                      | 3         | yes<br>father – het c.304C>A<br>p.(Arg102Ser)<br>mother - het<br>c.1705C>A<br>p.(Gln569Lys)                   |
|               |                | 13           | het<br>c.1705C>A       | p.(Gln569Lys)             | Possibly damaging<br>Deleterious<br>Disease causing<br>C45        | 0.0001299<br>never hom | C-terminus                                                | 3         |                                                                                                               |

|              |                                                               |    |                  |               |                                                            |                         |                         |   |                                                                                                           |
|--------------|---------------------------------------------------------------|----|------------------|---------------|------------------------------------------------------------|-------------------------|-------------------------|---|-----------------------------------------------------------------------------------------------------------|
| <b>F435</b>  | <b>CIC006<br/>44</b>                                          | 1  | het<br>c.304C>A  | p.(Arg102Ser) | Probably damaging<br>Deleterious<br>Disease causing<br>C0  | 0.0001516<br>never hom  | GAF1                    | 3 | no                                                                                                        |
|              |                                                               | 13 | het<br>c.1705C>A | p.(Gln569Lys) | Possibly damaging<br>Deleterious<br>Disease causing<br>C45 | 0.0001299<br>never hom  | C-terminus              | 3 |                                                                                                           |
| <b>F1605</b> | <b>CIC036<br/>50</b>                                          | 10 | het c.1268del    | p.(Leu423*)   | NA                                                         | 0                       | GAF2                    | 4 | yes<br>unaffected brother -<br>het c.1268del<br>p.(Leu423*)<br>mother - het<br>c.1705C>A<br>p.(Gln569Lys) |
|              |                                                               | 13 | het<br>c.1705C>A | p.(Gln569Lys) | Possibly damaging<br>Deleterious<br>Disease causing<br>C45 | 0.0001299<br>never hom  | C-terminus              | 3 |                                                                                                           |
| <b>F1628</b> | <b>CIC036<br/>80<br/>(Index)<br/>CIC110<br/>66<br/>Sister</b> | 1  | hom<br>c.305G>A  | p.(Arg102His) | Probably damaging<br>Deleterious<br>Disease causing<br>C0  | 0.00002165<br>never hom | GAF1                    | 3 | yes                                                                                                       |
| <b>F2187</b> | <b>CIC044<br/>95</b>                                          | 13 | hom<br>c.1705C>A | p.(Gln569Lys) | Possibly damaging<br>Deleterious<br>Disease causing<br>C45 | 0.0001299<br>never hom  | C-terminus              | 3 | no                                                                                                        |
| <b>F2276</b> | <b>CIC046<br/>17</b>                                          | 13 | hom<br>c.1683G>A | p.(Trp561*)   | NA                                                         | 0.00000406<br>1         | Truncated<br>protein/NM | 5 | yes<br>mother, father and                                                                                 |

|              |                      |    |                        |               |                   |                         |                                                                                                        |       |                                                                                        |
|--------------|----------------------|----|------------------------|---------------|-------------------|-------------------------|--------------------------------------------------------------------------------------------------------|-------|----------------------------------------------------------------------------------------|
|              |                      |    |                        |               |                   | never hom               | D                                                                                                      |       | unaffected brother –<br>het c.1683G>A<br>p.(Trp561*)                                   |
| <b>F2374</b> | <b>CIC047<br/>74</b> | 1  | het c.205C>T           | p.(Gln69*)    | NA                | 0.00003230<br>never hom | Truncated<br>protein/NM<br>D                                                                           | 6     | Yes<br>mother – het<br>c.2233C>T<br>p.(Gln745*)<br>father - het c.205C>T<br>p.(Gln69*) |
|              |                      | 19 | het<br>c.2233C>T       | p.(Gln745*)   | NA                | 0                       | Truncated<br>protein/NM<br>D                                                                           | novel |                                                                                        |
| <b>F2379</b> | <b>CIC047<br/>78</b> | 6  | het<br>c.998+1G>A      |               | NA                | 0.00002887<br>never hom | Alteration<br>of the<br>reference<br>donor site,<br>most<br>probably<br>affecting<br>splicing          | 3     | yes<br>mother – het<br>c.998+1G>A<br>unaffected sister - het<br>c.1065+2T>A            |
|              |                      | 7  | het<br>c.1065+2T><br>A |               | NA                | 0                       | GAF2-<br>Alteration<br>of the<br>reference<br>donor site,<br>most<br>probably<br>affecting<br>splicing | novel |                                                                                        |
| <b>F2800</b> | <b>CIC054<br/>88</b> | 10 | het c.1268del          | p.(Leu423*)   | NA                | 0                       | GAF2                                                                                                   | 4     | yes<br>mother- het c.1268del                                                           |
|              |                      | 13 | het                    | p.(Gln569Lys) | Possibly damaging | 0.0001299               | C-terminus                                                                                             | 3     |                                                                                        |

|              |                                                                |    |                        |               |                                                         |                        |                                                                                                        |       |                                              |
|--------------|----------------------------------------------------------------|----|------------------------|---------------|---------------------------------------------------------|------------------------|--------------------------------------------------------------------------------------------------------|-------|----------------------------------------------|
|              | <b>(Index)</b><br><b>CIC110</b><br><b>40</b><br><b>Brother</b> |    | c.1705C>A              |               | Deleterious<br>Disease causing<br>C45                   | never hom              |                                                                                                        |       | p.(Leu423*)                                  |
| <b>F3051</b> | <b>CIC058</b><br><b>39</b>                                     | 7  | het<br>c.1065+1G><br>T |               | NA                                                      | 0                      | GAF2-<br>Alteration<br>of the<br>reference<br>donor site,<br>most<br>probably<br>affecting<br>splicing | novel | yes<br>mother het c.1072A>T<br>p.(Asn358Tyr) |
|              |                                                                | 8  | het<br>c.1072A>T       | p.(Asn358Tyr) | Probably damaging<br>Tolerated<br>Disease causing<br>C0 | 0                      | GAF2                                                                                                   | novel |                                              |
| <b>F3678</b> | <b>CIC067</b><br><b>62</b>                                     | 11 | hom c.1474-<br>1G>A    |               | NA                                                      | 0                      | Alteration<br>of the<br>reference<br>acceptor<br>site, most<br>probably<br>affecting<br>splicing       | novel | no                                           |
| <b>F3808</b> | <b>CIC069</b><br><b>49</b>                                     | 1  | het<br>c.304C>A        | p.(Arg102Ser) | Probably damaging<br>Deleterious                        | 0.0001516<br>never hom | GAF1                                                                                                   | 3     | no                                           |

|              |                                                    |          |                                      |                                |                                                                                                                                                                 |                                                                                              |                                             |                        |                                                                                                                                                                 |
|--------------|----------------------------------------------------|----------|--------------------------------------|--------------------------------|-----------------------------------------------------------------------------------------------------------------------------------------------------------------|----------------------------------------------------------------------------------------------|---------------------------------------------|------------------------|-----------------------------------------------------------------------------------------------------------------------------------------------------------------|
|              |                                                    |          |                                      |                                | Disease causing<br>C0                                                                                                                                           |                                                                                              |                                             |                        |                                                                                                                                                                 |
|              |                                                    | 13       | het<br>c.1705C>A                     | p.(Gln569Lys)                  | Possibly damaging<br>Deleterious<br>Disease causing<br>C45                                                                                                      | 0.0001299<br>never hom                                                                       | C-terminus                                  | 3                      |                                                                                                                                                                 |
| <b>F3944</b> | <b>CIC071<br/>71</b>                               | 17<br>21 | het<br>c.2125G>A<br>het<br>c.2368C>T | p.(Glu709Lys)<br>p.(Arg790Cys) | Variant exon 17:<br>Probably damaging<br>Deleterious<br>Disease causing<br>C15<br>Variant exon 21<br>Probably damaging<br>Deleterious<br>Disease causing<br>C55 | Variant<br>exon 17<br>0.0002166<br>never hom<br>variant exon<br>21<br>0.0001868<br>never hom | Both<br>variants on<br>C-terminus           | Both variants<br>novel | yes<br>three unaffected<br>brothers, one<br>unaffected sister and<br>reference<br>mother - Het<br>c.2125G>A,<br>p.(Glu709Lys) het<br>c.2368C>T,<br>p.(Arg790Cys |
|              |                                                    | 20       | het<br>c.2318_2319<br>del            | p.(Gln773Argfs<br>*5)          | NA                                                                                                                                                              | 0                                                                                            | Truncated<br>protein/NM<br>D C-<br>terminus | novel                  |                                                                                                                                                                 |
| <b>F3959</b> | <b>CIC078<br/>81<br/>(Index)</b>                   | 10       | het<br>c.1351C>T                     | p.(Gln451*)                    | NA                                                                                                                                                              | 0                                                                                            | Truncated<br>protein/NM<br>D                | novel                  | yes<br>one unaffected brother<br>- het c.1724T>C ,<br>p.(Leu575Pro)                                                                                             |
|              | <b>CIC071<br/>95<br/>(Brother<br/>)<br/>CIC073</b> | 13       | het<br>c.1724T>C                     | p.(Leu575Pro)                  | Probably damaging<br>Deleterious<br>Disease causing<br>C65                                                                                                      | 0                                                                                            | C-terminus                                  | novel                  |                                                                                                                                                                 |

|              |                              |    |           |               |                                                            |                              |                              |       |                                                                             |
|--------------|------------------------------|----|-----------|---------------|------------------------------------------------------------|------------------------------|------------------------------|-------|-----------------------------------------------------------------------------|
|              | <b>28<br/>(Brother<br/>)</b> |    |           |               |                                                            |                              |                              |       |                                                                             |
| <b>F5017</b> | <b>CIC088<br/>20</b>         | 13 | c.1705C>A | p.(Gln569Lys) | Possibly damaging<br>Deleterious<br>Disease causing<br>C45 | 0.0001299<br>never hom       | C-terminus                   | 3     | yes<br>unaffected brother and<br>father – het<br>c.1705C>A<br>p.(Gln569Lys) |
|              |                              | 16 | c.1966G>T | p.(Glu656*)   | NA                                                         | 0.00000722<br>4<br>never hom | Truncated<br>protein/NM<br>D | novel |                                                                             |

NMD- Nonsense-mediated mRNA decay

Nucleotide numbering is based on cDNA sequence of *PDE6A* refseq NM\_000440.2 where A of the ATG initiation codon is 1;

NA - not applicable; hom- homozygous; het- heterozygous

hom: variant at the homozygous state in gnomAD; MAF: minor allele frequency based on gnomAD database

(<http://gnomad.broadinstitute.org/gene/ENSG00000132915>, November 2017). Pathologic prediction based on PolyPhen-2

(<http://genetics.bwh.harvard.edu/pph2/>), SIFT (<http://sift.jcvi.org/>), MutationTaster (<http://www.mutationtaster.org/>) and Align GVD

(<http://agvgd.iarc.fr/>). The scoring of Align GVD ranges from the most likely deleterious “C65” to the least likely deleterious

“C0”. Pathogenicity of splicing mutations was performed using Human Splicing Finder (<http://www.umd.be/HSF3/index.html>)

Novelty of mutations was verified using HGMDPro ([https://portal.biobase-international.com/hgmd/pro/search\\_gene.php](https://portal.biobase-international.com/hgmd/pro/search_gene.php))



**eTable 2. Patients With *PDE6B* Mutations Identified in this Study With *In Silico* Analysis on Variants.**

| Family Number | Patient Number | Exon/ Intron | Mutation at cDNA Level         | Mutation at Protein Level | Pathogenic prediction by PolyPhen-2 SIFT MutationTaster Align GVGD | MAF                      | Protein Domain Involved / Putative Functional Consequence                            | Reference | Familial Segregation Possible                          |
|---------------|----------------|--------------|--------------------------------|---------------------------|--------------------------------------------------------------------|--------------------------|--------------------------------------------------------------------------------------|-----------|--------------------------------------------------------|
| F103          | CIC00133       | 12           | hom<br>c.1614G>C               | p.(Glu538Asp)             | Benign Tolerated Disease causing C0                                | 0                        | C-terminus/ Alteration of the reference donor site, most probably affecting splicing | novel     | no                                                     |
| F144          | CIC00195       | 1            | het c.181G>T                   | p.(Glu61*)                | NA                                                                 | 0.000004098<br>never hom | Truncated protein/NM D                                                               | novel     | no                                                     |
|               |                | 9            | het<br>c.1133G>A               | p.(Trp378*)               | NA                                                                 | 0.00002534<br>never hom  | Truncated protein/NM D                                                               | 7         |                                                        |
| F652          | CIC01071       | 16           | het<br>c.1927_1969<br>delinsGG | p.(Asn643Glyfs*29)        | NA                                                                 | 0                        | C-terminus                                                                           | 8         | yes<br>father – het<br>c.2565A>G,<br>p.(*855Trpext*30) |
|               |                | 22           | het<br>c.2565A>G               | p.(*855Trpext*30)         | NA                                                                 | 0.000004063              | C-terminus                                                                           | novel     |                                                        |

|              |                      |    |                  |               |                                                            |                         |                              |       |                                                                                           |
|--------------|----------------------|----|------------------|---------------|------------------------------------------------------------|-------------------------|------------------------------|-------|-------------------------------------------------------------------------------------------|
|              |                      |    |                  |               |                                                            |                         |                              |       | mother - het<br>c.1927_1969delinsG<br>G,<br>p.(Asn643Glyfs*29)                            |
| <b>F798</b>  | <b>CIC013<br/>18</b> | 1  | hom<br>c.299G>A  | p.(Arg100His) | Probably Damaging<br>Deleterious<br>Disease causing<br>C0  | 0.00005386<br>never hom | GAF1                         | 8     | Yes                                                                                       |
| <b>F1084</b> | <b>CIC028<br/>66</b> | 7  | hom<br>c.1010A>G | p.(His337Arg) | Benign<br>Deleterious<br>Disease causing<br>C0             | 0                       | GAF2                         | 9     | yes, affected sister<br>and affected nephew<br>also hom with<br>multiple<br>consanguinity |
| <b>F1300</b> | <b>CIC031<br/>34</b> | 19 | hom<br>c.2197G>C | p.(Ala733Pro) | Probably Damaging<br>Deleterious<br>Disease causing<br>C25 | 0                       | C-terminus                   | 10    | No                                                                                        |
| <b>F1372</b> | <b>CIC032<br/>45</b> | 1  | het<br>c.409G>A  | p.(Gly137Arg) | Probably Damaging<br>Tolerated<br>Disease causing<br>C0    | 0                       | GAF1                         | novel | yes<br>unaffected brother,<br>sister and mother - het<br>c.892C>T<br>p.(Gln298*)          |
|              |                      | 5  | het c.892C>T     | p.(Gln298*)   | NA                                                         | 0.00003972<br>never hom | Truncated<br>protein/NM<br>D | 11    |                                                                                           |
| <b>F1385</b> | <b>CIC032<br/>78</b> | 5  | hom<br>c.892C>T  | p.(Gln298*)   | NA                                                         | 0.00003972<br>never hom | Truncated<br>protein/NM<br>D | 11    | No                                                                                        |
| <b>F1709</b> | <b>CIC037</b>        | 1  | het              | p.(Arg98Pro)  | Probably Damaging                                          | 0                       | GAF1                         | novel | yes                                                                                       |

|              |                                                   |    |                                 |                        |                                                |                         |                                                                                                     |       |                                                                                        |
|--------------|---------------------------------------------------|----|---------------------------------|------------------------|------------------------------------------------|-------------------------|-----------------------------------------------------------------------------------------------------|-------|----------------------------------------------------------------------------------------|
|              | <b>81<br/>(Index)</b>                             |    | c.293G>C                        |                        | Deleterious<br>Disease causing<br>C0           |                         |                                                                                                     |       | unaffected sister -<br>reference                                                       |
|              | <b>CIC040<br/>06<br/>(Brother<br/>)</b>           | 7  | het<br>c.1010A>G                | p.(His337Arg)          | Benign<br>Deleterious<br>Disease causing<br>C0 | 0                       | GAF2                                                                                                | 9     |                                                                                        |
|              | <b>CIC050<br/>60<br/>(Sister)</b>                 |    |                                 |                        |                                                |                         |                                                                                                     |       |                                                                                        |
| <b>F1784</b> | <b>CIC039<br/>05</b>                              | 11 | hom c.1468-<br>1G>A             |                        | NA                                             | 0                       | Alteration<br>of the<br>reference<br>acceptor<br>site,<br>most<br>probably<br>affecting<br>splicing | novel | yes<br>Unaffected sister –<br>het<br>c.1923_1969delinsTC<br>TGGG<br>p.(Asn643Glyfs*29) |
|              |                                                   | 16 | c.1923_1969<br>delinsTCTG<br>GG | p.(Asn643Glyfs<br>*29) | NA                                             | 0                       | Truncated<br>protein/NM<br>D                                                                        | 12    |                                                                                        |
| <b>F1808</b> | <b>CIC039<br/>38<br/>(index)</b><br><b>CIC042</b> | 8  | het<br>c.1107+3A><br>G          |                        | NA                                             | 0.00003969<br>never hom | Alteration<br>of the<br>reference<br>donor site,<br>most<br>probably                                | 8     | yes<br>mother and one<br>unaffected sisters- het<br>c.1655G>A<br>p.(Arg552Gln          |

|              |                        |    |                        |               |                                                           |                              |                                                                                                        |       |                                                               |
|--------------|------------------------|----|------------------------|---------------|-----------------------------------------------------------|------------------------------|--------------------------------------------------------------------------------------------------------|-------|---------------------------------------------------------------|
|              | <b>37<br/>(sister)</b> |    |                        |               |                                                           |                              | affecting<br>splicing                                                                                  |       | Father – het<br>c.1107+3A>G                                   |
|              |                        | 13 | het<br>c.1655G>A       | p.(Arg552Gln) | Probably Damaging<br>Deleterious<br>Disease causing<br>C0 | 0                            | C-terminus                                                                                             | 13    |                                                               |
| <b>F1933</b> | <b>CIC041<br/>17</b>   | 9  | het<br>c.1257+1G><br>A |               | NA                                                        | 0.00000407<br>3<br>never hom | GAF2-<br>Alteration<br>of the<br>reference<br>donor site,<br>most<br>probably<br>affecting<br>splicing | novel | yes<br>Father het<br>c.1257+1G>A<br>mother het<br>c.2193+1G>A |
|              |                        | 18 | het<br>c.2193+1G><br>A |               | NA                                                        | 0.000065<br>never hom        | Alteration<br>of the<br>reference<br>donor site,<br>most<br>probably<br>affecting<br>splicing          | 14    |                                                               |
| <b>F1946</b> | <b>CIC041<br/>21</b>   | 17 | hom<br>c.2045T>C       | p.(Ile682Thr) | Possibly Damaging<br>Deleterious<br>Disease causing<br>C0 | 0                            | C-terminus                                                                                             | novel | no                                                            |
| <b>F2056</b> | <b>CIC042<br/>91</b>   | 12 | hom<br>c.1580T>C       | p.(Leu527Pro) | Probably damaging<br>Deleterious                          | 0.00006507<br>never hom      | C-terminus                                                                                             | 14    | no                                                            |

|              |                                                                      |    |                        |               | Disease causing C25                          |                              |                                                                                                              |       |                                                                                        |
|--------------|----------------------------------------------------------------------|----|------------------------|---------------|----------------------------------------------|------------------------------|--------------------------------------------------------------------------------------------------------------|-------|----------------------------------------------------------------------------------------|
| <b>F2571</b> | <b>CIC050<br/>98<br/>(Index)<br/><br/>CIC052<br/>14<br/>(Sister)</b> | 9  | hom<br>c.1257+1G><br>A |               | NA                                           | 0.00000407<br>3<br>never hom | GAF2-<br>Alteration<br>of the<br>reference<br>donor site,<br>most<br>probably<br>affecting<br>splicing       | novel | yes                                                                                    |
| <b>F2712</b> | <b>CIC053<br/>51</b>                                                 | 1  | het<br>c.132C>A        | p.(Cys44*)    | NA                                           | 0                            | Truncated<br>protein/NM<br>D                                                                                 | novel | yes<br>father het c.132C>A,<br>p.(Cys44*)<br>mother het<br>c.1614G>C,<br>p.(Glu538Asp) |
|              |                                                                      | 12 | het<br>c.1614G>C       | p.(Glu538Asp) | Benign<br>Tolerated<br>Disease causing<br>C0 | 0                            | C-terminus/<br>Alteration<br>of the<br>reference<br>donor site,<br>most<br>probably<br>affecting<br>splicing | novel |                                                                                        |
| <b>F2719</b> | <b>CIC053<br/>69<br/>Index<br/><br/>CIC064</b>                       | 8  | het<br>c.1107+3A><br>G |               | NA                                           | 0.00003969<br>never hom      | Alteration<br>of the<br>reference<br>donor site,<br>most                                                     | 8     | yes                                                                                    |

|              |                                            |    |                                |                    |                                                |                         |                                                                          |       |                                    |
|--------------|--------------------------------------------|----|--------------------------------|--------------------|------------------------------------------------|-------------------------|--------------------------------------------------------------------------|-------|------------------------------------|
|              | <b>70<br/>(sister)</b>                     |    |                                |                    |                                                |                         | probably affecting splicing                                              |       |                                    |
|              |                                            | 21 | het<br>c.2387T>C               | p.(Met796Thr)      | Probably Damaging Tolerated Disease causing C0 | 0.00002032<br>never hom | C-terminus                                                               | novel |                                    |
|              | <b>CIC064<br/>72<br/>(affected nephew)</b> | 4  | het<br>c.797_798ins<br>GGTACTT | p.(Tyr267Valfs*24) | NA                                             | 0                       | GAF2                                                                     | novel |                                    |
|              | <b>CIC064<br/>68<br/>(affected nephew)</b> | 8  | het<br>c.1107+3A><br>G         |                    | NA                                             | 0.00003969<br>never hom | Alteration of the reference donor site, most probably affecting splicing | 8     |                                    |
| <b>F3037</b> | <b>CIC058<br/>22</b>                       | 16 | hom<br>c.1927_1969<br>delinsGG | p.(Asn643Glyfs*29) | NA                                             | 0                       | Truncated protein/NMD                                                    | 8     | no                                 |
| <b>F3289</b> | <b>CIC062<br/>32</b>                       | 8  | het<br>c.1107+3A><br>G         |                    | NA                                             | 0.00003969<br>never hom | Alteration of the reference donor site, most                             | 8     | yes<br>mother - het<br>c.1107+3A>G |

|              |                           |    |                  |               |                                                   |                              |                                                                                         |       |                                       |
|--------------|---------------------------|----|------------------|---------------|---------------------------------------------------|------------------------------|-----------------------------------------------------------------------------------------|-------|---------------------------------------|
|              |                           |    |                  |               |                                                   |                              | probably affecting splicing                                                             |       |                                       |
|              |                           | 12 | het<br>c.1614G>C | p.(Glu538Asp) | Benign Tolerated Disease causing C0               | 0                            | C-terminus/<br>Alteration of the reference donor site, most probably affecting splicing | novel |                                       |
| <b>F3435</b> | <b>CIC064 51</b>          | 7  | hom<br>c.1010A>G | p.(His337Arg) | Benign Deleterious Disease causing C0             | 0                            | GAF2                                                                                    | 9     | yes<br>unaffected brother - reference |
| <b>F3440</b> | <b>CIC064 59 (Index)</b>  | 13 | het<br>c.1678C>T | p.(Arg560Cys) | Probably Damaging Deleterious Disease causing C65 | 0                            | C-terminus                                                                              | 15    | yes                                   |
|              | <b>CIC064 60 (Sister)</b> | 14 | het<br>c.1726G>A | p.(Gly576Ser) | Probably Damaging Tolerated Disease causing C0    | 0.00000406<br>7<br>never hom | C-terminus                                                                              | novel |                                       |
| <b>F3797</b> | <b>CIC069 28</b>          | 18 | hom<br>c.2152G>T | p.(Asp718Tyr) | Probably Damaging Deleterious Disease causing C65 | 0.00004330<br>never hom      | C-terminus                                                                              | novel | no                                    |

|              |                                                                 |    |                               |                        |                                                            |                              |                                                                                               |       |                                                                                   |
|--------------|-----------------------------------------------------------------|----|-------------------------------|------------------------|------------------------------------------------------------|------------------------------|-----------------------------------------------------------------------------------------------|-------|-----------------------------------------------------------------------------------|
| <b>F4102</b> | <b>CIC074<br/>27</b>                                            | 7  | hom<br>c.1010A>G              | p.(His337Arg)          | Benign<br>Deleterious<br>Disease causing<br>C0             | 0                            | GAF2                                                                                          | 9     | no                                                                                |
| <b>F4491</b> | <b>CIC080<br/>50<br/>(Index)<br/>CIC095<br/>97<br/>(Sister)</b> | 18 | het<br>c.2193+1G><br>A        |                        | NA                                                         | 0.000065<br>never hom        | Alteration<br>of the<br>reference<br>donor site,<br>most<br>probably<br>affecting<br>splicing | 14    | yes<br>mother – het<br>c.2193+1G>A<br>Father - het<br>c.2215G>A,<br>p.(Glu739Lys) |
|              |                                                                 | 19 | het<br>c.2215G>A              | p.(Glu739Lys)          | Probably Damaging<br>Deleterious<br>Disease causing<br>C55 | 0.00000406<br>5<br>never hom | C-terminus                                                                                    | novel |                                                                                   |
| <b>F4993</b> | <b>CIC087<br/>86</b>                                            | 1  | hom<br>c.409G>A               | p.(Gly137Arg)          | Probably Damaging<br>Tolerated<br>Disease causing<br>C0    | 0                            | GAF1                                                                                          | novel | no                                                                                |
| <b>F4999</b> | <b>CIC087<br/>95</b>                                            | 1  | het<br>c.313G>A               | p.(Glu105Lys)          | Probably Damaging<br>Deleterious<br>Disease causing<br>C0  | 0.00006461                   | GAF2                                                                                          | 7     | no                                                                                |
|              |                                                                 | 14 | het<br>c.1733_1734<br>delinsC | p.(Leu578Profs*<br>14) | NA                                                         | 0                            | Truncated<br>protein/NM<br>D                                                                  | novel |                                                                                   |



NMD- Nonsense-mediated mRNA decay

Nucleotide numbering is based on cDNA sequence of *PDE6B* refseq NM\_000283.3 where A of the ATG initiation codon is 1; patients with one mutation are homozygous and patients with two different mutations are compound heterozygous.

NA - not applicable; hom- homozygous; het- heterozygous

hom- homozygous variant at the homozygous state in gnomAD; MAF: minor allele frequency based on gnomAD database (<http://gnomad.broadinstitute.org/gene/ENSG00000133256>, November 2017). Pathologic prediction based on PolyPhen-2 (<http://genetics.bwh.harvard.edu/pph2/>), SIFT (<http://sift.jevl.org/>), MutationTaster (<http://www.mutationtaster.org/>) and Align GVD (<http://agvgd.iarc.fr/>). The scoring of Align GVD ranges from the most likely deleterious “C65” to the least likely deleterious “C0”. Pathogenicity of splicing mutations was performed using Human Splicing Finder (<http://www.umd.be/HSF3/index.html>).

Novelty of mutations was verified using HGMDPro ([https://portal.biobase-international.com/hgmd/pro/search\\_gene.php](https://portal.biobase-international.com/hgmd/pro/search_gene.php))

**eTable 3. List of Mutations Identified in *PDE6A* in Our Cohort.** Reference SNP number, number of families harboring this mutation, novelty, gnomAD and ExAc population allelic frequency, predicted pathogenicity of novel missense mutations (MutationTaster, PolyPhen-2 and SIFT), amino acid conservation and effect/evidence based on ACMG/AMP standards and guidelines are indicated.

| rs#         | Mutation                           | Number of Families | Novelty | gnomAD     | ExAc       | Mutation Taster            | PolyPhen-2               | SIFT                      | Conservation | Effect/ Evidence                                         |
|-------------|------------------------------------|--------------------|---------|------------|------------|----------------------------|--------------------------|---------------------------|--------------|----------------------------------------------------------|
|             | c.205C>T<br>p.(Gln69*)             | 1                  | 6       | 0.00003230 | 0          |                            |                          |                           |              | Pathogenic (Id)<br>PVS1, PM2, PP3, PP4                   |
| rs141252097 | c.304C>A<br>p.(Arg102Ser)          | 3                  | 3       | 0.0001516  | 0.0001071  | Disease causing<br>(0.998) | Probably damaging<br>(1) | Deleterious<br>(score: 0) | High         | Likely pathogenic (IV)<br>PM1, PM2, PM3, PP4, PP3        |
| rs750539462 | c.305G>A<br>p.(Arg102His)          | 1                  | 3       | 0.00002165 | 0          | Disease causing<br>(1)     | Probably damaging<br>(1) | Deleterious<br>(score: 0) | High         | Pathogenic (IIIb)<br>PP1-S, PM1, PM2, PP3, PP1, PP4, BP1 |
|             | c.823_824del<br>p.(Tyr275Leufs*15) | 1                  | Novel   | 0          | 0          | Disease causing<br>(1)     |                          |                           |              | Pathogenic (Ib)<br>PVS1, PM2, PM3, PM4                   |
| rs748946491 | c.998+1G>A                         | 1                  | 3,16,17 | 0.00002887 | 0.00002471 |                            |                          |                           | High         | Pathogenic (Ia)<br>PVS1, PS1, PM2, PM3                   |
|             | c.1065+1G>T                        | 1                  | Novel   | 0          | 0          |                            |                          |                           | High         | Pathogenic (Ib)<br>PVS1, PM1, PM2, PM3                   |
|             | c.1065+2T>A                        | 1                  | Novel   | 0          | 0          |                            |                          |                           | High         | Pathogenic (Ib)<br>PVS1, PM1, PM2, PM3, PP3, PP4         |
|             | c.1072A>T<br>p.(Asn358Tyr)         | 1                  | Novel   | 0          | 0          | Disease causing<br>(1)     | Probably damaging<br>(1) | Tolerated<br>(0.09)       | High         | Pathogenic (IIIa)<br>PS4, PM1, PM2, PM3, PP3, PP4, BP1   |
|             | c.1236del<br>p.(Phe412Leufs*12)    | 1                  | Novel   | 0          | 0          | Disease causing<br>(1)     |                          |                           |              | Pathogenic (Ib)<br>PVS1, PM1, PM2, PM3, PP3, PP4         |
|             | c.1268del<br>p.(Leu423*)           | 2                  | 4       | 0          | 0          | Disease causing<br>(1)     |                          |                           |              | Pathogenic (Ib)<br>PVS1, PM1, PM2, PM3, PP3, PP4         |

|             |                                     |   |       |             |             |                            |                              |                              |          |                                                                |
|-------------|-------------------------------------|---|-------|-------------|-------------|----------------------------|------------------------------|------------------------------|----------|----------------------------------------------------------------|
|             | c.1351C>T<br>p.(Gln451*)            | 1 | Novel | 0           | 0           | Disease causing<br>(1)     |                              |                              |          | Pathogenic (Ib)<br>PVS1, PM2,<br>PM3, PP3, PP4                 |
|             | c.1474-1G>A                         | 1 | Novel | 0           | 0           | Disease causing<br>(1)     |                              |                              | High     | Pathogenic (Id)<br>PVS1, PM2, PP3,<br>PP4                      |
| rs121918578 | c.1683G>A<br>p.(Trp561*)            | 1 | 5,17  | 0.000004061 | 0           | Disease causing<br>(1)     |                              |                              |          | Pathogenic (Id)<br>PVS1, PM2, PP3,<br>PP4, BP1                 |
| rs139444207 | c.1705C>A<br>p.(Gln569Lys)          | 7 | 3     | 0.0001299   | 0.00009885  | Disease causing<br>(1)     | Possibly damaging<br>(0.494) | Deleterious<br>(score: 0)    | High     | Pathogenic (IIIa)<br>PS1, PM1, PM2,<br>PM3, PP3, PP1,<br>BP1   |
| rs759537984 | c.1724T>C<br>p.(Leu575Pro)          | 1 | Novel | 0           | 0.000008238 | Disease causing<br>(1)     | Probably damaging<br>(0.981) | Deleterious<br>(score: 0)    | High     | Pathogenic (IIIa)<br>PP1-S, PM1,<br>PM2, PM3, PP3,<br>PP4, BP1 |
| rs199871385 | c.1966G>T<br>p.(Glu656*)            | 1 | Novel | 0.000007224 | 0.00002475  | Disease causing<br>(1)     |                              |                              |          | Pathogenic (Ib)<br>PVS1, PM1,<br>PM2, PM3, PP3,<br>PP4         |
| rs148637474 | c.2125G>A<br>p.(Glu709Lys)          | 1 | Novel | 0.0002166   | 0.0002423   | Disease causing<br>(1)     | Probably damaging<br>(1)     | Deleterious<br>(score: 0.03) | High     | Likely pathogenic<br>(IV)<br>PM1, PM2, PM3,<br>PP3, PP4, BP1   |
|             | c.2233C>T<br>p.(Gln745*)            | 1 | Novel | 0           | 0           | Disease causing<br>(1)     |                              |                              |          | Pathogenic (Ib)<br>PVS1, PM2,<br>PM3, PP3, PP4                 |
|             | c.2318_2319del<br>p.(Gln773Argfs*5) | 1 | Novel | 0           | 0           | Disease causing<br>(1)     |                              |                              |          | Pathogenic (Ib)<br>PVS1, PM2,<br>PM3, PP3, PP4                 |
|             | c.2366C>T<br>p.(Ser789Phe)          | 1 | Novel | 0           | 0           | Disease causing<br>(0.995) | Probably damaging<br>(0.980) | Tolerated<br>(0.09)          | Moderate | Likely pathogenic<br>(IV)<br>PM2, PM3, PM1,<br>PP3, PP4        |

|             |                            |   |       |           |           |                        |                          |                           |      |                                                         |
|-------------|----------------------------|---|-------|-----------|-----------|------------------------|--------------------------|---------------------------|------|---------------------------------------------------------|
| rs150879429 | c.2368C>T<br>p.(Arg790Cys) | 1 | Novel | 0.0001868 | 0.0001895 | Disease causing<br>(1) | Probably damaging<br>(1) | Deleterious<br>(score: 0) | High | Likely pathogenic<br>(IV)<br>PM1, PM2, PM3,<br>PP3, PP4 |
|-------------|----------------------------|---|-------|-----------|-----------|------------------------|--------------------------|---------------------------|------|---------------------------------------------------------|

**eTable 4. List of Mutations Identified in *PDE6B* in Our Cohort.** Reference SNP number, number of families harboring this mutation, novelty, gnomAD and ExAc population allelic frequency, predicted pathogenicity of novel missense mutations (MutationTaster, PolyPhen-2 and SIFT) and amino acid conservation and effect/evidence based on ACMG/AMP standards and guidelines are indicated.

| rs#         | Mutation                                  | Number of Families | Novelty | gnomAD      | ExAc        | Mutation Taster        | PolyPhen-2               | SIFT                | Conservation | Effect/Evidence                                               |
|-------------|-------------------------------------------|--------------------|---------|-------------|-------------|------------------------|--------------------------|---------------------|--------------|---------------------------------------------------------------|
|             | c.132C>A<br>p.(Cys44*)                    | 1                  | Novel   | 0           | 0           |                        |                          |                     |              | Pathogenic (Ib)<br>PVS1, PM2,<br>PM3, PP3, PP4                |
| rs767438881 | c.181G>T<br>p.(Glu61*)                    | 1                  | Novel   | 0.000004098 | 0.000008495 |                        |                          |                     |              | Pathogenic (Ib)<br>PVS1, PM2,<br>PM3, PP3, PP4                |
|             | c.293G>C<br>p.(Arg98Pro)                  | 1                  | Novel   | 0           | 0           | Disease Causing<br>(1) | Probably Damaging<br>(1) | Deleterious<br>(0)  | High         | Pathogenic (IIIa)<br>PP1-S, PM2,<br>PM3, PM1,<br>PP3, PP4     |
| rs555600300 | c.299G>A<br>p.(Arg100His)                 | 1                  | 8       | 0.00005386  | 0.0001091   | Disease Causing<br>(1) | Probably Damaging<br>(1) | Deleterious<br>(0)  | High         | Likely pathogenic (IV)<br>PM1, PM2,<br>PM3, PP4, PP3          |
| rs398123299 | c.313G>A<br>p.(Glu105Lys)                 | 1                  | 18      | 0.00006461  | 0.00002039  | Disease Causing<br>(1) | Probably Damaging<br>(1) | Deleterious<br>(0)  | High         | Likely pathogenic (IV)<br>PM1, PM2,<br>PM3, PP3, PP4          |
| rs781658083 | c.409G>A<br>p.(Gly137Arg)                 | 2                  | Novel   | 0           | 0           | Disease Causing<br>(1) | Probably Damaging<br>(1) | Tolerated<br>(0.37) | High         | Likely pathogenic (IV)<br>PM2, PM1,<br>PM3, PP3, PP4          |
|             | c.797_798insGGTACTT<br>p.(Tyr267Valfs*24) | 1                  | Novel   | 0           | 0           |                        |                          |                     |              | Pathogenic (Ia)<br>PVS1, PP1-S,<br>PM2, PM1,<br>PM3, PP3, PP4 |
| rs121918579 | c.892C>T                                  | 2                  | 17,19   | 0.00003972  | 0.00004157  |                        |                          |                     |              | Pathogenic (Ib)                                               |

|             |                            |   |          |             |            |                        |                              |                       |               |                                                         |
|-------------|----------------------------|---|----------|-------------|------------|------------------------|------------------------------|-----------------------|---------------|---------------------------------------------------------|
|             | p.(Gln298*)                |   |          |             |            |                        |                              |                       |               | PVS1, PM1, PM2, PM3, PP3, PP4                           |
|             | c.1010A>G<br>p.(His337Arg) | 4 | 9        | 0           | 0          | Disease Causing<br>(1) | Benign<br>(0.046)            | Deleterious<br>(0)    | High          | Pathogenic (IIIa)<br>PP1-S, PM1, PM2, PM3, PP3, PP4     |
| rs370898371 | c.1107+3A>G                | 4 | 8        | 0.00003969  | 0.00004135 |                        |                              |                       | Moderate      | Pathogenic (IIIb)<br>PP1-S, PM2, PM3, PP3, PP4          |
| rs367889201 | c.1133G>A<br>p.(Trp378*)   | 1 | 18,20,21 | 0.00002534  | 0          |                        |                              |                       |               | Pathogenic (Ib)<br>PVS1, PM2, PM3, PP3, PP4             |
|             | c.1257+1G>A                | 2 | Novel    | 0.000004073 | 0          |                        |                              |                       | High          | Pathogenic (Ia)<br>PVS1, PP1-S, PM1, PM2, PM3, PP3, PP4 |
|             | c.1468-1G>A                | 1 | Novel    | 0           | 0          |                        |                              |                       | High          | Pathogenic (Ib)<br>PVS1, PM2, PM3, PP3, PP4             |
| rs760766981 | c.1580T>C<br>p.(Leu527Pro) | 2 | 22       | 0.00006507  | 0.00008335 | Disease Causing<br>(1) | Probably Damaging<br>(0.999) | Deleterious<br>(0.01) | Not conserved | Likely pathogenic (IV)<br>PM1, PM2, PM3, PP3, PP4       |
|             | c.1614G>C<br>p.(Glu538Asp) | 2 | Novel    | 0           | 0          | Disease Causing<br>(1) | Benign<br>(0.038)            | Tolerated<br>(0.15)   | High          | Likely pathogenic (IV)<br>PM1, PM2, PM3, PP3, PP4       |
| rs751859807 | c.1655G>A<br>p.(Arg552Gln) | 2 | 13       | 0           | 0.00003450 | Disease Causing<br>(1) | Probably Damaging<br>(0.989) | Deleterious<br>(0.05) | High          | Pathogenic (IIIa)<br>PP1-S, PM1,                        |

|             |                                               |   |          |             |            |                           |                                 |                     |          |                                                              |
|-------------|-----------------------------------------------|---|----------|-------------|------------|---------------------------|---------------------------------|---------------------|----------|--------------------------------------------------------------|
|             |                                               |   |          |             |            |                           |                                 |                     |          | PM2, PM3,<br>PP3, PP4                                        |
| rs201541131 | c.1678C>T<br>p.(Arg560Cys)                    | 1 | 15,23    | 0           | 0.00003306 | Disease<br>Causing<br>(1) | Probably<br>Damaging<br>(0.999) | Deleterious<br>(0)  | High     | Pathogenic<br>(IIIa)<br>PP1-S, PM1,<br>PM2, PM3,<br>PP3, PP4 |
| rs753925314 | c.1726G>A<br>p.(Gly576Ser)                    | 1 | Novel    | 0.000004067 | 0          | Disease<br>Causing<br>(1) | Probably<br>Damaging<br>(0.999) | Tolerated<br>(0.31) | High     | Pathogenic<br>(IIIa)<br>PP1-S, PM1,<br>PM2, PM3,<br>PP3, PP4 |
|             | c.1733_1734delinsC<br>p.(Leu578Profs*14)      | 1 | Novel    | 0           | 0          |                           |                                 |                     |          | Pathogenic (Ib)<br>PVS1, PM2,<br>PM3, PP3, PP4               |
|             | c.1923_1969delinsTCTGGG<br>p.(Asn643Glyfs*29) | 1 | 12,24    | 0           | 0          |                           |                                 |                     |          | Pathogenic (Ib)<br>PVS1, PM2,<br>PM3, PP3, PP4               |
|             | c.1927_1969delinsGG<br>p.(Asn643fs)           | 2 | 8        | 0           | 0          |                           |                                 |                     |          | Pathogenic (Ib)<br>PVS1, PM2,<br>PM3, PP3, PP4               |
|             | c.2045T>C<br>p.(Ile682Thr)                    | 1 | Novel    | 0           | 0          | Disease<br>Causing<br>(1) | Possibly<br>Damaging<br>(0.871) | Deleterious<br>(0)  | Moderate | Likely<br>pathogenic (IV)<br>PM1, PM2,<br>PM3, PP3, PP4      |
| rs150639487 | c.2152G>T<br>p.(Asp718Tyr)                    | 1 | Novel    | 0.00004330  | 0.00004961 | Disease<br>Causing<br>(1) | Probably<br>Damaging<br>(0.996) | Deleterious<br>(0)  | High     | Likely<br>pathogenic (IV)<br>PM2, PM1,<br>PM3, PP3, PP4      |
| rs727504075 | c.2193+1G>A                                   | 2 | 22,25,26 | 0.00006500  | 0.00008287 |                           |                                 |                     | High     | Pathogenic (Ia)<br>PVS1, PP1-S,<br>PM2, PM3,<br>PP3, PP4     |

|             |                                |   |       |             |             |                           |                                 |                     |      |                                                              |
|-------------|--------------------------------|---|-------|-------------|-------------|---------------------------|---------------------------------|---------------------|------|--------------------------------------------------------------|
|             | c.2197G>C<br>p.(Ala733Pro)     | 1 | 10    | 0           | 0           | Disease<br>Causing<br>(1) | Probably<br>Damaging<br>(0.999) | Deleterious<br>(0)  | High | Likely<br>pathogenic (IV)<br>PM1, PM2,<br>PM3, PP3, PP4      |
| rs778255348 | c.2215G>A<br>p.(Glu739Lys)     | 1 | Novel | 0.000004065 | 0.000008371 | Disease<br>Causing<br>(1) | Probably<br>Damaging<br>(1)     | Deleterious<br>(0)  | High | Pathogenic<br>(IIIb)<br>PP1-S, PM3,<br>PM2, PP3, PP4         |
| rs745856717 | c.2387T>C<br>p.(Met796Thr)     | 1 | Novel | 0.00002032  | 0.00001649  | Disease<br>Causing<br>(1) | Probably<br>Damaging<br>(0.999) | Tolerated<br>(0.23) | High | Pathogenic<br>(IIIa)<br>PP1-S, PM2,<br>PM3, PP3,<br>PP4, PM1 |
| rs201097242 | c.2565A>G<br>p.(*855Trpext*30) | 1 | Novel | 0.000004063 | 0           |                           |                                 |                     |      | Pathogenic (Ib)<br>PVS1, PM1,<br>PM2, PM3,<br>PP3, PP4       |



eTable 5. Clinical Data of Patients Harboring *PDE6A* Mutations.

| Patient          | Age at time of testing | Age at time of diagnosis | Sex | Genetic test | Allele I                     | Allele II                       | Relevant medical and ophthalmology history | Family history                | Symptoms at diagnosis                         | BCVA OD/OS Refraction                                  | Lens  | Color vision 15 desaturated HUE | Binocular kinetic Visual field III4e | FFERG | Fundus examination                                                                                                                               | SD-OCT                                                                                                                  | SWAF                                                                                        | NIRAF                                                              |
|------------------|------------------------|--------------------------|-----|--------------|------------------------------|---------------------------------|--------------------------------------------|-------------------------------|-----------------------------------------------|--------------------------------------------------------|-------|---------------------------------|--------------------------------------|-------|--------------------------------------------------------------------------------------------------------------------------------------------------|-------------------------------------------------------------------------------------------------------------------------|---------------------------------------------------------------------------------------------|--------------------------------------------------------------------|
| CIC00496<br>F339 | 12                     | 6                        | F   | NGS          | c.1236del p.(Phe412Leufs*12) | c.823_824del p.(Tyr275Leufs*15) | None                                       | Sporadic, from French descent | Night blindness                               | 20/25<br>+1.75(-0.50)180°<br>20/25<br>+1.50(-0.25)180° | Clear | Normal                          | 38x25                                | UD    | Well colored optic nerve, normal retinal vessels, chorioretinal atrophy outside the vascular arcades with few salt and pepper appearance, BSPs   | CME, preserved foveal EZ                                                                                                | Hyper AF ring, heterogeneous AF in the posterior pole                                       | Hyper AF ring surrounding the fovea containing patchy hypo AF dots |
| CIC00644<br>F435 | 41                     | 13                       | M   | ASPER        | c.304C>A p.(Arg102Ser)       | c.1705C>A p.(Gln569Lys)         | None                                       | Sporadic, from French descent | Night blindness, followed by VF abnormalities | 20/20<br>-0.25(+0.50)45°<br>20/25<br>-1(+1.75)90°      | Clear | Normal                          | 50x25                                | UD    | Slightly waxy optic disc, narrow retinal vessels, diffuse peripheral atrophy encroaching the posterior pole, salt and pepper appearance atrophic | Flattening of the foveal pit due to ERM, cyst in the INL, preserved EZ, choroidal nevus temporal to the fovea in the RE | Hyper AF ring surrounding the fovea combined with hypo AF dots within the peripheral retina | Hyper AF circle                                                    |

|                                 |    |    |   |       |                           |                            |                                                        |                                                |                 |                                                       |                              |                                                        |                                                        |                       |                                                                                                                                          |                                                                                                                                                                                                               |                                                                                                                                                              |                                                                                                      |  |
|---------------------------------|----|----|---|-------|---------------------------|----------------------------|--------------------------------------------------------|------------------------------------------------|-----------------|-------------------------------------------------------|------------------------------|--------------------------------------------------------|--------------------------------------------------------|-----------------------|------------------------------------------------------------------------------------------------------------------------------------------|---------------------------------------------------------------------------------------------------------------------------------------------------------------------------------------------------------------|--------------------------------------------------------------------------------------------------------------------------------------------------------------|------------------------------------------------------------------------------------------------------|--|
|                                 |    |    |   |       |                           |                            |                                                        |                                                |                 |                                                       |                              |                                                        |                                                        |                       |                                                                                                                                          | chorioretinal patches                                                                                                                                                                                         |                                                                                                                                                              |                                                                                                      |  |
| <b>CIC00570</b><br><b>F383</b>  | 38 | NA | M | ASPER | c.304C>A<br>p.(Arg102Ser) | c.1705C>A<br>p.(Gln569Lys) | None                                                   | Sporadic, from French descent                  | Night blindness | 20/32<br>-2.25(-1.75)20°<br>20/32<br>-1.75(-1.75)160° | PSC<br>C                     | Tritan axis in the RE and borderline in the LE         | 20 central degrees with far temporal and nasal islands | UD                    | Waxy disc, very narrow vessels, diffuse retinal atrophy delimiting the fovea, ring of parafoveal atrophy, dense BSPs in the periphery    | Well preserved foveal lamination, posterior staphyloma                                                                                                                                                        | Round hyper AF ring surrounding the fovea with hypo AF patches on its outer border                                                                           | Hyper AF circle surrounded by hypo AF patches                                                        |  |
| <b>CIC03680</b><br><b>F1628</b> | 51 | 18 | F | ASPER | c.305G>A<br>p.(Arg102His) | c.305G>A<br>p.(Arg102His)  | LE<br>Cataract extraction at 30 YO, Glaucoma in the LE | Three other affected siblings, Italian descent | Night blindness | 20/25<br>+1.00(-0.50)10°<br>LP<br>Plano               | RE<br>cataract,<br>LE<br>IOL | Tritan axis in the RE and could not identify in the LE | 5 central degrees                                      | UD                    | Waxy looking optic disc in the RE and 0.7 optic disc cupping of LE, BE PPA, narrowed vessels, diffuse retinal atrophy combined with BSPs | Diffuse retinal atrophy, small island of preserved EZ in the RE and involvement of the fovea in the LE. Minimal hyporeflective cysts compatible with very mild CME, hyper reflective dots in the outer retina | Double hyper AF rings in the macula of RE and hypo AF patches surrounding . Small island of hyper AF patch on top of the LE foveal area with diffuse hypo AF | Increased hyper AF fading peripherally in the RE. Round hyper AF patch on the center of the LE fovea |  |
| <b>CIC4617</b>                  | 19 | 19 | F | NGS   | c.1683G>A<br>p.(Trp561*)  | c.1683G>A<br>p.(Trp561*)   | None                                                   | From Turkish origin,                           | Night blindness | 20/25<br>-3                                           | Clear                        | Normal                                                 | 30 central degrees                                     | Severely reduced cone | Normal optic disc, normal                                                                                                                | Diffuse atrophy of the ONL and                                                                                                                                                                                | Large perifoveal ring of                                                                                                                                     | Hyper AF ring                                                                                        |  |

|                           |    |    |   |     |                         |                         |                              |                                                |                                            |                                                    |          |                                                  |                               |                                                   |                                                                                                                                |                                                                                                                                          |                                                                 |                                                 |
|---------------------------|----|----|---|-----|-------------------------|-------------------------|------------------------------|------------------------------------------------|--------------------------------------------|----------------------------------------------------|----------|--------------------------------------------------|-------------------------------|---------------------------------------------------|--------------------------------------------------------------------------------------------------------------------------------|------------------------------------------------------------------------------------------------------------------------------------------|-----------------------------------------------------------------|-------------------------------------------------|
| <b>F2276</b>              |    |    |   |     |                         |                         | cousin parents               |                                                | 20/32<br>-1.75                             |                                                    |          | with peripheral crescent-shaped bilateral fields | response and UD rod responses | vessels, peripheral atrophy, macular preservation | EZ except for the foveal and perifoveal region in BE. Very thin ERM on the LE                                                  | increased AF                                                                                                                             |                                                                 |                                                 |
| <b>CIC4778<br/>F2379</b>  | 51 | 15 | F | NGS | c.998+1G>A              | c.1065+2T>A             | Car accident trauma at 28 YO | The father is French and the mother German     | Night blindness                            | 20/40<br>+1.75(-2)5°<br>20/40<br>+1.75(-1.25)170°  | Clear    | Tritan axis in the RE and borderline in the LE   | <10 central degrees           | UD                                                | Waxy optic disc, narrow retinal vessels, diffuse peripheral retinal atrophy. Perifoveal atrophy with minor foveal preservation | Posterior staphyloma, diffuse atrophy involving the fovea. Small remnant area of disrupted EZ, hyper reflective dots in the outer retina | Hyper AF on the fovea containing hypo AF patches                | Faint hyper AF with highlighted hypo AF patches |
| <b>CIC00318<br/>F217</b>  | 48 | 10 | F | NA  | c.2366C>T p.(Ser789Phe) | c.2366C>T p.(Ser789Phe) | Diabetes mellitus II         | Algerian, multiple consanguinity in the family | Night blindness followed by decreased BCVA | 20/500<br>-1.50<br>20/500<br>-1.00                 | IOL, PCO | Complete dyschromatopsia                         | <10 central degrees           | UD                                                | Waxy optic discs, narrow retinal vessels, diffuse retinal atrophy                                                              | Diffuse retinal thinning, some preservation of the EZ, hyper reflective dots in the outer retina                                         | Hyper AF with hypo AF inside                                    | Hyper AF fovea                                  |
| <b>CIC04495<br/>F2187</b> | 37 | 6  | M | NGS | c.1705C>A p.(Gln569Lys) | c.1705C>A p.(Gln569Lys) | BE cataract extraction       | Adopted                                        | Progressive BCVA                           | 20/50<br>-1.0(-0.5)90°<br>20/50<br>-1.75(-0.25)90° | IOL      | Tritan axis                                      | 10 central degrees            | UD                                                | Waxy optic disc, retinal atrophy surrounding the fovea, dense BSPs in the mid                                                  | Atrophic outer retinal layers, small preserved island within the fovea                                                                   | Hyper AF within the arcades with hyper AF ring around the fovea | Hyper AF fovea with hypo AF dots inside         |

|                           |    |    |   |     |                                  |                                                     |                           |                                                    |                                 |                                                       |       |                      |                                                         |                                           |                                                                                                           |                                                                      |                          |                                    |
|---------------------------|----|----|---|-----|----------------------------------|-----------------------------------------------------|---------------------------|----------------------------------------------------|---------------------------------|-------------------------------------------------------|-------|----------------------|---------------------------------------------------------|-------------------------------------------|-----------------------------------------------------------------------------------------------------------|----------------------------------------------------------------------|--------------------------|------------------------------------|
|                           |    |    |   |     |                                  |                                                     |                           |                                                    |                                 |                                                       |       |                      |                                                         |                                           | and far periphery                                                                                         |                                                                      |                          |                                    |
| <b>CIC06762<br/>F3678</b> | 34 | 34 | F | NGS | c.1474-1G>A                      | c.1474-1G>A                                         | Amelogenesis imperfecta   | Sporadic, from Tunisian descent with consanguinity | Night blindness                 | 20/25<br>(-0.75)180°<br>20/32<br>+1.0(-1.75)5°        | Clear | Normal               | 160x120                                                 | Decreased responses                       | Mild waxy optic disc, narrow retinal vessels, peripheral retinal atrophy with preserved fovea             | Well preservation of the foveal layering                             | Hyperperifoveal AF       | Hyper AF fovea                     |
| <b>CIC07171<br/>F3944</b> | 47 | 11 | F | NGS | c.2318_2319del p.(Gln773Argfs*5) | c.2125G>A p.(Glu709Lys)/<br>c.2368C>T p.(Arg790Cys) | None                      | Sporadic, from French descent                      | Photophobia,<br>Night blindness | 20/25<br>+1.50(-3.00)15°<br>20/32<br>-0.25(-2.50)170° | PSCC  | Normal               | 30x20                                                   | UD                                        | Normal optic disc, mildly narrow retinal vessels, peripheral retinal atrophy extending beyond the arcades | Atrophic ONL and EZ beyond the foveal area, thin ERM                 | Perifoveal hyper AF ring | Round hyper AF ring over the fovea |
| <b>CIC06949<br/>F3808</b> | 33 | 29 | F | NGS | c.304C>A p.(Arg102Ser)           | c.1705C>A p.(Gln569Lys)                             | None                      | Sister with RP, from French descent                | Night blindness                 | 20/25<br>-1.50<br>20/20<br>-1(-1.25)80°               | Clear | Tritan axis          | Central 10 degrees with bilateral and inferior crescent | Very small and delayed photopic responses | Waxy optic disc, mild narrow vessels, retinal atrophy encroaching the perifovea, cellophane reflex        | Thin ONL, relative preservation of the EZ beyond the fovea, thin ERM | Perifoveal hyper AF ring | Round hyper AF fovea               |
| <b>CIC07195</b>           | 61 | 7  | M | NGS | c.1724T>C, p.(Leu575Pro)         | c.1351C>T p.(Gln451*)                               | Cataract extraction BE at | Two affected brothers,                             | VF constriction                 | 20/40<br>-0.25(-                                      | IOL   | Borderline to Tritan | <10 central                                             | UD                                        | Waxy optic disc, narrow                                                                                   | Small subfoveal island of                                            | Parafoveal hyper AF ring | Hyper AF fovea surrounded          |

|                        |    |    |   |     |                          |                         |                        |                                            |    |                                                     |       |                                |                    |    |                                                                                                |                                                                                                |                                                                |                                                                                     |
|------------------------|----|----|---|-----|--------------------------|-------------------------|------------------------|--------------------------------------------|----|-----------------------------------------------------|-------|--------------------------------|--------------------|----|------------------------------------------------------------------------------------------------|------------------------------------------------------------------------------------------------|----------------------------------------------------------------|-------------------------------------------------------------------------------------|
| <b>F3959</b>           |    |    |   |     |                          |                         | 35 YO                  | from French descent                        |    | 1.00)175°<br>20/32<br>-1.00(-0.50)170°              |       | axis                           | degrees            |    | vessels, diffuse retinal atrophy, dense BSPs in the mid- and far-periphery                     | preserved EZ, thin atrophic retina peripherally                                                | surrounded by hypo AF dots in its outer border                 | d by hypo AF dots in its outer border                                               |
| <b>CIC073 28 F3959</b> | 59 | 6  | M | NGS | c.1724T>C p.(Leu575Pro)  | c.1351C>T p.(Gln451*)   | Cataract extraction    | Two affected brothers, from French descent | NA | 20/40<br>-0.25(-0.25)<br>20/40<br>-1.00(-1.25)115°  | IOL   | Normal in RE, Tritan in the LE | 5 central degrees  | UD | Waxy optic disc, PPA, narrow vessels, diffuse retinal atrophy, dense BSPs beyond the arcades   | ONL atrophy, small subfoveal island of EZ, hyper-reflective dots in the outer retina, thin ERM | Hyper AF fovea with irregular margins                          | Small hyper AF blot-shaped surrounded by hyper AF crescent                          |
| <b>CIC078 81 F3959</b> | 55 | 5  | M | NGS | c.1724T>C, p.(Leu575Pro) | c.1351C>T p.(Gln451*)   | BE cataract extraction | Two affected brothers, from French descent | NA | 20/32<br>Plano<br>20/32<br>Plano(-1.00)15°          | IOL   | Normal                         | 15 central degrees | UD | Waxy optic disc, narrow vessels, diffuse retinal atrophy encroaching the fovea                 | Atrophic ONL, preserved subfoveal island, minimal hyporeflective cysts within the fovea        | Perifoveal hyper AF ring with hypo AF dots on its outer border | Circle-shaped hyper AF in the fovea, surrounded by hypo AF dots on its outer border |
| <b>CIC058 39 F3051</b> | 17 | 12 | M | NGS | c.1065+1G>T              | c.1072A>T p.(Asn358Tyr) | None                   | None, from French descent                  | NA | 20/20<br>+0.50(-1.25)15°<br>20/20<br>+1.50(-1.50)0° | Clear | Normal                         | 30 central degrees | UD | Normal optic nerve, slightly narrow vessels, diffuse retinal atrophy with well-preserved fovea | Normal foveal ONL surrounded by disappearance by outer retinal layers                          | Large hyper AF ring                                            | Target-shape hyper AF                                                               |

|                                |    |    |   |     |                            |                            |                                          |                                                          |                                                      |                                                               |              |             |                          |    |                                                                                                                                  |                                                                                                      |                                                            |                                      |
|--------------------------------|----|----|---|-----|----------------------------|----------------------------|------------------------------------------|----------------------------------------------------------|------------------------------------------------------|---------------------------------------------------------------|--------------|-------------|--------------------------|----|----------------------------------------------------------------------------------------------------------------------------------|------------------------------------------------------------------------------------------------------|------------------------------------------------------------|--------------------------------------|
| <b>CIC036<br/>50<br/>F1605</b> | 42 | 7  | F | NGS | c.1268del<br>p.(Leu423*)   | c.1705C>A<br>p.(Gln569Lys) | Previous<br>infection<br>with<br>Malaria | Sporadic,<br>from<br>French<br>descent                   | NA                                                   | 20/22<br>+0.25(-<br>2.75)175°<br>20/22<br>+0.5(-2.50)5°       | PSC<br>C     | Normal      | 10<br>central<br>degrees | UD | Mildly<br>waxy optic<br>disc,<br>narrowed<br>retinal<br>vessels,<br>diffuse<br>retinal<br>atrophy,<br>foveal<br>preservatio<br>n | Preserved<br>foveal<br>structure, LE<br>thin ERM                                                     | Perifoveal<br>hyper AF<br>ring                             | NA                                   |
| <b>CIC047<br/>74<br/>F2374</b> | 22 | 7  | F | NGS | c.205C>T<br>p.(Gln69*)     | c.2233C>T<br>p.(Gln745*)   | Glauco<br>ma                             | Sporadic,<br>None,<br>from<br>French<br>descent          | Night<br>blindness                                   | 20/63<br>-0.75(-<br>0.75)140°<br>20/40<br>-1.00(-<br>0.75)40° | PSC<br>C     | Tritan axis | 10<br>central<br>degrees | UD | Normal<br>optic disc,<br>diffuse<br>retinal<br>atrophy<br>sparing the<br>fovea                                                   | Preserved<br>foveal<br>EZ,<br>CME                                                                    | Hyper AF<br>ring<br>containing<br>AF dots<br>due to<br>CME | Hyper AF<br>circle over<br>the fovea |
| <b>CIC054<br/>88<br/>F2800</b> | 41 | 20 | M | NGS | c.1268del<br>p.(Leu423*)   | c.1705C>A<br>p.(Gln569Lys) | Cataract<br>extractio<br>n<br>surgery    | One<br>affected<br>brother,<br>from<br>French<br>descent | Night<br>blindness<br>followed by<br>photophobi<br>a | 20/20<br>+0.50(-0.75)5°<br>20/20<br>+0.50(-<br>1.50)175°      | IOL          | NA          | 20<br>central<br>degrees | NA | Waxy optic<br>disc,<br>narrow<br>retinal<br>vessels,<br>BSPs in the<br>periphery                                                 | Preserved<br>ONL at the<br>fovea and<br>beyond,<br>subtle intra-<br>retinal cyst<br>in the INL       | Hyper AF<br>fovea and<br>surrounding<br>patchy<br>hypo AF  | NA                                   |
| <b>CIC088<br/>20<br/>F5017</b> | 42 | 20 | F | NGS | c.1705C>A<br>p.(Gln569Lys) | c.1966G>T<br>p.(Glu656*)   | None                                     | Sporadic,<br>from<br>French<br>descent                   | Night<br>blindness                                   | 20/160<br>-0.25(-<br>1.25)75°<br>20/63<br>-0.75(-<br>1.00)30° | Catar<br>act | Tritan axis | 30<br>central<br>degrees | UD | Waxy optic<br>disc,<br>slightly<br>narrow<br>retinal<br>vessels,<br>BSPs<br>outside the<br>arcades                               | Thin ONL,<br>hyper<br>reflective<br>dots in the<br>outer retina,<br>abnormal<br>outer retina<br>band | Heterogene<br>ous hyper<br>AF fovea                        | Heterogen<br>eous hyper<br>AF fovea  |

BCVA: best corrected visual acuity; BSPs: Bone-spicule like pigmentations; CME: cystoid macular edema; ERM: epiretinal membrane; IRF: intra retinal fluid; UD: not detectable; AF: autofluorescence; RE: right eye; LE: left eye; IOL: intra ocular lens; CF: counting fingers; HM: hand motion; LP: light perception; PPA: Peripapillary atrophy; PSSC: posterior subcapsular cataract; PCO: Posterior capsular opacification; RP: retinitis pigmentosa; ONL: Outer Nuclear Layer, EZ: Ellipsoid zone, NA- not available.

eTable 6. Clinical Data of Patients Harboring *PDE6B* Mutations.

| Patient                         | Age at time of testing | Age at time of diagnosis | Sex | Genetic test | Allele I                       | Allele II                                 | Relevant medical and ophthalmology history | Family history                                   | Symptoms at diagnosis                      | BCVA OD/OS Refraction                                | Lens            | Color vision 15 desaturated HUE | Binocular kinetic Visual field III4e                           | FFERG                                  | Fundus examination                                                                | SD-OCT                                              | SWAF                                                                                          | NIRAF                                       |
|---------------------------------|------------------------|--------------------------|-----|--------------|--------------------------------|-------------------------------------------|--------------------------------------------|--------------------------------------------------|--------------------------------------------|------------------------------------------------------|-----------------|---------------------------------|----------------------------------------------------------------|----------------------------------------|-----------------------------------------------------------------------------------|-----------------------------------------------------|-----------------------------------------------------------------------------------------------|---------------------------------------------|
| <b>CIC00133</b><br><b>F103</b>  | 28                     | 15                       | F   | NGS          | c.1614G>C<br>p.(Glu538Asp)     | c.1614G>C<br>p.(Glu538Asp)                | None                                       | None, consanguineous parents from French descent | Night blindness                            | 20/100<br>+2(-3.50)0°<br>20/80<br>+1(-2.25)170°      | RE PSCC, LE IOL | Tritan defect                   | 5 central degrees                                              | UD                                     | Well colored optic nerve, bone spicules in periphery, CME                         | CME, preserved fovea                                | Peripheral ring of increased AF, foveal AF changes due to CME, patchy loss of AF in periphery | Hypo AF<br>fovea, unspecific hyper AF       |
| <b>CIC01071</b><br><b>F652</b>  | 27                     | 6                        | M   | NGS          | c.2565A>G<br>p.(*855Trpext*30) | c.1927_1969delinsGG<br>p.(Asn643Glyfs*29) | None                                       | None, from French descent                        | Night blindness, visual field constriction | 20/32<br>+2.25(-2.50)5°<br>20/25<br>+2.75(-2.50)180° | Clear           | Normal                          | 20 central degrees                                             | UD                                     | Normal optic nerve, normal retinal vessels, mottled pigmentation in periphery     | ERM RE, Relatively preserved foveal structure       | Thick ring of increased AF with hyper AF in fovea and outside vascular arcade                 | Hyper AF surrounded by ring of hypo AF      |
| <b>CIC01318</b><br><b>F798</b>  | 52                     | NA                       | M   | NGS          | c.299G>A<br>p.(Arg100His)      | c.299G>A<br>p.(Arg100His)                 | Hodgkin lymphoma                           | None, from French descent                        | Night blindness                            | 20/13<br>+2(-1.75)85°<br>20/16<br>+2.25(-1.75)95)    | Clear           | Normal                          | 40 central degrees with preserved bitemporal islands           | Moderately severe rod-cone dysfunction | Well colored optic nerve, narrowed blood vessels, pigmentary changes in periphery | Well preserved foveal structure                     | Large ring of hyper AF with patchy loss of AF in periphery                                    | Hyper AF<br>fovea                           |
| <b>CIC02866</b><br><b>F1084</b> | 45                     | 24                       | M   | NGS          | c.1010A>G<br>p.(His337Arg)     | c.1010A>G<br>p.(His337Arg)                | None                                       | One affected sister consanguinity, north Africa  | Night blindness                            | 20/100<br>-1.75(2.25)85°<br>20/160<br>-3.00(-        | Small PSCC      | Tritan Axis                     | 45 central degrees and a peripheral ring between 50-70 degrees | UD                                     | Well colored optic disc, narrow retinal vessels, retinal atrophy up               | ERM, preserved subfoveal EZ, small cysts in the ONL | Hyper AF with punctate hypo AF lesions                                                        | Hyper AF<br>fovea in BE but faint in the LE |



|                                 |    |    |   |           |                          |                            |      |                                                                                                                         |                           |                                                        |            |                              |                                                     |    |                                                                                   |                                                |                                                                                                                 |                |
|---------------------------------|----|----|---|-----------|--------------------------|----------------------------|------|-------------------------------------------------------------------------------------------------------------------------|---------------------------|--------------------------------------------------------|------------|------------------------------|-----------------------------------------------------|----|-----------------------------------------------------------------------------------|------------------------------------------------|-----------------------------------------------------------------------------------------------------------------|----------------|
|                                 |    |    |   |           |                          |                            |      |                                                                                                                         |                           | 0.50)100°                                              |            |                              |                                                     |    |                                                                                   | to the arcades                                 |                                                                                                                 |                |
| <b>CIC03245</b><br><b>F1372</b> | 34 | 31 | M | ASPE<br>R | c.892C>T<br>p.(Gln298*)  | c.409G>A<br>p.(Gly137Arg)  | None | None, from French descent                                                                                               | Night blindness           | 20/32<br>-0.25(-0.75)70°<br>20/32<br>+1(-2.25)         | Small PSCC | Normal                       | 160x120                                             | UD | Well colored optic nerve, narrowed blood vessels, pigmentary changes in periphery | Well preserved foveal structure                | Ring of hyper AF with patchy loss of AF in periphery                                                            | Hyper fovea AF |
| <b>CIC03278</b><br><b>F1385</b> | 39 | 4  | M | ASPE<br>R | c.892C>T<br>p.(Gln298*)  | c.892C>T<br>p.(Gln298*)    | None | None, from French descent, parents distant cousins                                                                      | Night blindness           | 20/40<br>+1(-0.75)160°<br>20/50<br>+1(-0.25)95°        | PSCC       | Mild tritan defect           | 15 central degrees                                  | UD | Waxy optic disc, narrowed blood vessels, mottled pigmentation in periphery        | Small preservation of foveal structure         | Small ring of increased AF, patchy loss of FA in posterior pole and periphery                                   | Hyper fovea AF |
| <b>CIC03781</b><br><b>F1709</b> | 46 | 12 | M | NGS       | c.293G>C<br>p.(Arg98Pro) | c.1010A>G<br>p.(His337Arg) | None | One brother and two sisters affected out of a sibship of 8, parents from the same geographical region in Algeria        | Visual field constriction | 20/50<br>-4.25(-0.25)15°<br>20/200<br>-2.50(-1.75)105° | IOL        | Tritan defect                | 15 central degrees                                  | UD | Waxy optic disc, narrowed retinal vessels, bone spicules in periphery             | Thinning of outer retina                       | Loss of FA outside the vascular arcades and in the perifoveal area                                              | NA             |
| <b>CIC04006</b><br><b>F1709</b> | 42 | 37 | F | NGS       | c.293G>C<br>p.(Arg98Pro) | c.1010A>G<br>p.(His337Arg) | None | Two brother and one sister deceased sister affected out of a sibship of 8, parents from the same geographical region in | Night blindness           | 20/50<br>-0.75(-2.75)105°<br>20/40<br>-1.75(-2.25)70°  | Small PSCC | Two defect in tritan axis BE | 10 central degree with 2 temporal peripheral island | UD | Waxy optic disc, narrowed retinal vessels, mottled pigmentation in periphery      | CME with relative preservation of outer retina | Faint ring of increased AF around the fovea with changes due to CME, patchy loss of FA outside vascular arcades | Hyper fovea AF |

|                                 |    |    |   |                   |                           |                            |                      |                                                                                                                  |                                 |                                                        |      |             |                    |    |                                                                                                    |                                            |                                                                                         |                                                                  |
|---------------------------------|----|----|---|-------------------|---------------------------|----------------------------|----------------------|------------------------------------------------------------------------------------------------------------------|---------------------------------|--------------------------------------------------------|------|-------------|--------------------|----|----------------------------------------------------------------------------------------------------|--------------------------------------------|-----------------------------------------------------------------------------------------|------------------------------------------------------------------|
|                                 |    |    |   |                   |                           |                            |                      | Algeria                                                                                                          |                                 |                                                        |      |             |                    |    |                                                                                                    |                                            |                                                                                         |                                                                  |
| <b>CIC05060</b><br><b>F1709</b> | 53 | 18 | M | Sanger Sequencing | c.293G>C<br>p.(Arg98Pro)  | c.1010A>G<br>p.(His337Arg) | Crohn disease        | One brother and two sisters affected out of a sibship of 8, parents from the same geographical region in Algeria | Night blindness                 | 20/100<br>-0.50(-0.75)135°<br>20/50<br>-1(-0.25)150°   | IOL  | NA          | 10 central degrees | UD | Waxy optic disc, narrowed retinal vessels, numerous bone spicules in periphery, perifoveal atrophy | Thinning of outer retina                   | Loss of FA outside the vascular arcades and in the perifoveal area                      | AF fovea with ring of hypo AF                                    |
| <b>CIC04117</b><br><b>F1933</b> | 50 | 37 | M | ASPE R            | c.2193+1G>A               | c.1257+1G>A                | Hypercholesterolemia | None, from French descent                                                                                        | Night blindness since childhood | 20/25<br>-1.75(-1.25)10°<br>20/50<br>-1.75(-1.25)180°  | IOL  | Normal      | 30x20              | UD | Waxy optic disc, narrowed blood vessels, bone spicules in periphery, CME                           | CME with relatively preserved outer retina | Perifoveal ring of increased AF, changes of foveal AF due to CME, loss of peripheral AF | Hyper fovea AF                                                   |
| <b>CIC08050</b><br><b>F4491</b> | 43 | 10 | F | NGS               | c.2193+1G>A               | c.2215G>A                  | None                 | None, Italian origin                                                                                             | Night blindness                 | 20/28<br>-6.00(-2.50)85°<br>20/28<br>-6.50(-3.25)95°   | PSCC | Tritan axis | 20 central degrees | UD | Waxy optic disc, narrow vessels, diffuse retinal atrophy with BSPs                                 | CME, foveal preservation                   | Faint hyper AF ring in the LE only                                                      | Hyper fovea AF                                                   |
| <b>CIC09597</b><br><b>F4491</b> | NA | NA | M | Sanger Sequencing | c.2193+1G>A               | c.2215G>A<br>p.(Glu739Lys) | NA                   | NA                                                                                                               | NA                              | NA                                                     | NA   | NA          | NA                 | NA | NA                                                                                                 | NA                                         | NA                                                                                      | NA                                                               |
| <b>CIC08786</b><br><b>F4993</b> | 49 | 20 | F | NGS               | c.409G>A<br>p.(Gly137Arg) | c.409G>A<br>p.(Gly137Arg)  | Breast cancer        | Two affected brothers and an affected son, North African descent                                                 | Night blindness                 | 20/40<br>+0.75(-0.75)130°<br>20/40<br>+1.50(-1.00)110° | PSCC | Tritan axis | NA                 | UD | Normal optic disc, optic disc astrocytoma, narrow vessels, retinal atrophy combined with dense     | Retinal thinning, atrophic ONL             | Hypo AF ring perifoveal                                                                 | Small irregular hyper AF on the fovea surrounded by hypo AF ring |

|                                |    |    |   |     |                             |                            |           |                                                       |                                                         |                                                        |            |                                                          |                    |    |                                                                                                              |                                                                                                                          |                                                                                                                               |                                                                                                |
|--------------------------------|----|----|---|-----|-----------------------------|----------------------------|-----------|-------------------------------------------------------|---------------------------------------------------------|--------------------------------------------------------|------------|----------------------------------------------------------|--------------------|----|--------------------------------------------------------------------------------------------------------------|--------------------------------------------------------------------------------------------------------------------------|-------------------------------------------------------------------------------------------------------------------------------|------------------------------------------------------------------------------------------------|
|                                |    |    |   |     |                             |                            |           |                                                       |                                                         |                                                        |            |                                                          |                    |    | BSPs, atrophic changes within the fovea                                                                      |                                                                                                                          |                                                                                                                               |                                                                                                |
| <b>CIC031<br/>34<br/>F1300</b> | 51 | 26 | F | NGS | c.2197G>C<br>p.(Ala733Pro)  | c.2197G>C<br>p.(Ala733Pro) | None      | Two affected sisters, consanguinity, French Polynesia | Night blindness since childhood                         | 20/400<br>+2.25(-1.25)100°<br>20/25<br>+0.75(-1.50)77° | Cataract   | Normal in LE, couldn't perform in the RE due to low BCVA | 12 central degrees | UD | Normal optic disc, normal vessels, atrophic retina with clumped BSPs surrounding the posterior pole          | Almost full thickness macular hole in the RE. small preserved island of EZ subfoveal in the LE with posterior staphyloma | Disorganized hyper AF within the fovea of the RE delimited by hypo AF crescent temporally, hyper AF ring perifoveal in the LE | Hyper AF nasally in the fovea of RE combined with hypo AF temporally, hyper AF fovea in the LE |
| <b>CIC064<br/>51<br/>F3435</b> | 40 | 25 | M | NGS | c.1010A>G,<br>p.(His337Arg) | c.1010A>G<br>p.(His337Arg) | Type I DM | One affected brother, consanguinity, Algerian descent | Night blindness since childhood followed by VA decrease | 20/100<br>-0.75(-0.50)40°<br>20/800<br>plano           | Small PSCC | Impossible due to low VA                                 | 14 Central degrees | UD | Waxy optic disc, narrow retinal blood vessels, atrophic retina involving the fovea, BSPs outside the arcades | Thin ERM, atrophic ONL and EZ, hyper reflective dots in the outer retina                                                 | Irregular hyper AF fovea surrounded by granular hypo AF                                                                       | Disorganized hyper AF fovea RE>LE                                                              |
| <b>CIC074<br/>27<br/>F4102</b> | 55 | 30 | F | NGS | c.1010A>G<br>p.(His337Arg)  | c.1010A>G<br>p.(His337Arg) | None      | None, from Moroccan descent                           | Photophobia                                             | 20/200<br>+4.25(-3.25)95°<br>20/320<br>+4.75(-3.50)85° | Small PSCC | Tritan axis                                              | 20 Central degrees | UD | Waxy optic disc, narrow the retinal vessels, RP changes with BSPs along the vascular arcades and beyond      | Global thinning of the outer retina with some preservation of the subfoveal region. Hyper reflective dots in the         | Heterogeneous AF surrounded by hypo AF ring                                                                                   | Hyper AF fovea surrounded by ring-shaped hypo AF                                               |

|                                |    |    |   |     |                                               |                                                   |                     |                                      |                                        |                                                                  |               |                                        |                                                                                                       |    |                                                                                                                                                                        |                                                   |                                                                                                                                       |                                                                                                                |
|--------------------------------|----|----|---|-----|-----------------------------------------------|---------------------------------------------------|---------------------|--------------------------------------|----------------------------------------|------------------------------------------------------------------|---------------|----------------------------------------|-------------------------------------------------------------------------------------------------------|----|------------------------------------------------------------------------------------------------------------------------------------------------------------------------|---------------------------------------------------|---------------------------------------------------------------------------------------------------------------------------------------|----------------------------------------------------------------------------------------------------------------|
|                                |    |    |   |     |                                               |                                                   |                     |                                      |                                        |                                                                  |               |                                        |                                                                                                       |    |                                                                                                                                                                        | ONL                                               |                                                                                                                                       |                                                                                                                |
| <b>CIC058<br/>22<br/>F3037</b> | 67 | 12 | M | NGS | c.1927_1969delinsG<br>G<br>p.(Asn643Glyfs*29) | c.1927_1969delinsG<br>G<br>p.(Asn643Glyfs*29)     | None                | From<br>French<br>descent            | Photopho<br>bia                        | 20/200<br>+2.75(-<br>1.75)100°<br>20/125<br>+2.00(-<br>1.25)120° | IOL           | Tritan<br>defect                       | 20 Central<br>degrees                                                                                 | UD | Waxy optic<br>disc,<br>narrow<br>retinal<br>vessels,<br>chorioretina<br>l atrophy<br>delimiting<br>the macula,<br>foveal<br>atrophy,<br>BSPs<br>outside the<br>arcades | Atrophic<br>fovea,<br>remnants<br>of EZ<br>around | Central loss<br>of AF<br>surrounded<br>by area by<br>preserved<br>area of AF,<br>surrounded<br>by sharply<br>demarcated<br>loss of AF | Central loss of<br>AF surrounded<br>by area by<br>preserved area<br>of AF, sharply<br>demarcated<br>loss of AF |
| <b>CIC069<br/>28<br/>F3797</b> | 34 | 33 | M | NGS | c.2152G>T<br>p.(Asp718Tyr)                    | c.2152G>T<br>p.(Asp718Tyr)                        | Herpetic<br>uveitis | From<br>Congo<br>republic<br>descent | Night<br>blindness                     | 20/25<br>-3.50(-<br>0.5)180°<br>20/200<br>-2.75(-<br>1.25)180°   | PSCC          | Tritan<br>axis<br>RE>LE                | 50 x 30                                                                                               | UD | Waxy disc,<br>narrow<br>vessels,<br>retinal<br>atrophy,<br>BSPs<br>outside the<br>arcades                                                                              | Foveal<br>preservati<br>on                        | Hyper AF<br>ring RE,<br>hypo AF ring                                                                                                  | Hyper AF<br>fovea RE,<br>hypo AF ring                                                                          |
| <b>CIC062<br/>32<br/>F3289</b> | 24 | 12 | F | NGS | c.1107+3A>G                                   | c.1614G>C<br>p.(Glu538Asp)                        | None                | None, from<br>French<br>descent      | NA                                     | 20/40<br>+2.00(-<br>2.75)170°<br>20/40<br>+1.75(-<br>2.75)0°     | Small<br>PSCC | Tritan in<br>RE and<br>normal<br>in LE | 60 Central<br>degrees                                                                                 | UD | Normal<br>optic disc,<br>normal<br>retinal<br>vessels,<br>retinal<br>atrophy<br>encircling<br>the<br>posterior<br>pole, BSPs<br>outer to the<br>arcades                | CME,<br>preserved<br>EZ                           | Hyper AF<br>ring with<br>hyper AF<br>fovea                                                                                            | Hyper AF<br>fovea                                                                                              |
| <b>CIC039<br/>05<br/>F1784</b> | 49 | 16 | M | NGS | c.1468-1G>A                                   | c.1923_1969delinsTC<br>TGGG<br>p.(Asn643Glyfs*29) | None                | None, from<br>French<br>descent      | Night<br>blindness,<br>photopho<br>bia | 20/320<br>-0.5(-1.5)20°<br>20/80<br>-0.50(-<br>2)165°            | IOL           | Could<br>not be<br>perform<br>ed       | 10 Central<br>degrees,<br>30-180<br>and 30-60<br>degrees<br>horizontal<br>ly and<br>vertically<br>are | UD | Normal<br>optic disc,<br>narrow<br>retinal<br>vessels,<br>retinal<br>atrophy<br>involving<br>the macula,                                                               | foveal<br>preservati<br>on of EZ                  | Hyper AF<br>macula, hypo<br>AF fovea,<br>small hypo<br>AF dot in the<br>center                                                        | Hypo AF<br>fovea with<br>hyper AF in<br>the center                                                             |

|                                |    |    |   |     |                            |                            |          |                                                      |                                      |                                                       |                           |                                                          |                                                             |    |                                                                                                                       |                                                 |                                                     |                                          |             |    |
|--------------------------------|----|----|---|-----|----------------------------|----------------------------|----------|------------------------------------------------------|--------------------------------------|-------------------------------------------------------|---------------------------|----------------------------------------------------------|-------------------------------------------------------------|----|-----------------------------------------------------------------------------------------------------------------------|-------------------------------------------------|-----------------------------------------------------|------------------------------------------|-------------|----|
|                                |    |    |   |     |                            |                            |          |                                                      |                                      |                                                       |                           |                                                          | preserved, respectively                                     |    | clumped BSPs outside the arcades                                                                                      |                                                 |                                                     |                                          |             |    |
| <b>CIC053<br/>51<br/>F2712</b> | 31 | 10 | F | NGS | c.132C>A<br>p.(Cys44*)     | c.1614G>C<br>p.(Glu538Asp) | Glaucoma | Isolate case, no family history, from French descent | Night blindness and some photophobia | 20/22<br>-8.75(-2.00)10°<br>20/22<br>-7.50(-2.00)170° | Small PSCC                | Normal                                                   | 60 Central degrees                                          | UD | Slightly waxy optic disc, narrow retinal vessels, retinal atrophy encircling the fovea                                | Preserved foveal layering, posterior staphyloma | Hyper ring                                          | AF                                       | Hyper fovea | AF |
| <b>CIC041<br/>21<br/>F1946</b> | 26 | 26 | F | NGS | c.2045T>C<br>p.(Ile682Thr) | c.2045T>C<br>p.(Ile682Thr) | None     | From Moroccan descent                                | Night blindness                      | 20/20<br>+1.25(-1.00)35°<br>20/20<br>+1.75(-0.75)160° | Clear                     | Normal                                                   | 180 x 120<br>Small scotoma between 10-30 degrees inferiorly | UD | Normal optic disc, normal retinal vessels, atrophic retina delimiting the fovea, BSPs peripheral to the arcades       | Preserved foveal layering                       | Faint hyper AF ring                                 | Hyper fovea containing thin hypo AF ring | AF          | AF |
| <b>CIC042<br/>91<br/>F2056</b> | 59 | 22 | F | NGS | c.1580T>C<br>p.(Leu527Pro) | c.1580T>C<br>p.(Leu527Pro) | None     | From Slovenian descent                               | Night blindness                      | 20/80<br>+1.50(-3.25)70°<br>20/63<br>+0.75(-1.25)90°  | IOL, subluxated in the LE | Could not be performed in the RE, disorganized in the LE | 15 central degrees                                          | UD | Normal optic disc, narrow retinal vessels, retinal atrophy up to the periphery, pigmentary clumps outside the arcades | Small island of EZ subfoveal, thin ERM          | Hyper AF fovea combined with hypo AF punctate spots | NA                                       |             |    |
| <b>CIC001<br/>95<br/>F144</b>  | 40 | 3  | M | NGS | c.181G>T<br>p.(Glu61*)     | c.1133G>A<br>p.(Trp378*)   | None     | Sporadic case, From French descent                   | Night blindness                      | 20/25<br>-5.50(-1.5)10°                               | IOL                       | Normal                                                   | 10 central degrees                                          | UD | Waxy optic disc, narrow retinal vessels,                                                                              | Small island of EZ subfoveal, posterior         | Hyper ring, small hypo AF patches of AF             | Hyper fovea                              | AF          | AF |

|                                 |    |    |   |                   |                            |                                           |                             |                                                                                      |                                                                                  |                                                        |       |            |                                            |                                                          |                                                                                                                                    |                                        |                                         |                |    |
|---------------------------------|----|----|---|-------------------|----------------------------|-------------------------------------------|-----------------------------|--------------------------------------------------------------------------------------|----------------------------------------------------------------------------------|--------------------------------------------------------|-------|------------|--------------------------------------------|----------------------------------------------------------|------------------------------------------------------------------------------------------------------------------------------------|----------------------------------------|-----------------------------------------|----------------|----|
|                                 |    |    |   |                   |                            |                                           |                             |                                                                                      |                                                                                  | 20/32<br>-1.5(-1.5)130°                                |       |            |                                            |                                                          | atrophic peripheral retina with BSPs, RPE atrophy in the fovea                                                                     | staphyloma, thin ERM                   | centrally                               |                |    |
| <b>CIC08795</b><br><b>F4999</b> | 23 | 23 | F | NGS               | c.313G>A<br>p.(Glu105Lys)  | c.1733_1734delinsC<br>p.(Leu578Profs*14)  | RE<br>ptosis,<br>depression | Algerian<br>descent                                                                  | Night<br>blindness<br>followed<br>by<br>Photopho<br>bia,<br><br>BCVA<br>decrease | 20/32<br>+2.50(-3.00)20°<br>20/32<br>+3.00(-2.75)160°  | Clear | Borderline | 20 central<br>degrees                      | UD                                                       | Normal optic disc, narrow retinal vessels, retinal atrophy encroaching the macula, blurred foveal reflex, BSPs outside the arcades | Preserved outer retina besides the CME | Hyper AF ring, hyper AF dots due to CME | Hyper AF fovea | AF |
| <b>CIC06468</b><br><b>F2719</b> | 29 | NA | M | Sanger Sequencing | c.2387T>C<br>p.(Met796Thr) | c.797_798insGGTACTT<br>p.(Tyr267Valfs*24) | NA                          | Four affected subjects, father from French descent and mother from Algerian descents | NA                                                                               | 20/25<br>Plano(-2.75)180°<br>20/25<br>Plano(-2.50)180° | NA    | Normal     | NA                                         | Absent rod responses, reduced and delayed cone responses | Waxy optic disc, narrowed retinal vessels, peripheral atrophic retina, BSPs outside the arcades                                    | Well preserved fovea                   | Hyper AF ring                           | Hyper AF fovea | AF |
| <b>CIC06472</b><br><b>F2719</b> | 14 | NA | M | Sanger Sequencing | c.1107+3A>G                | c.797_798insGGTACTT<br>p.(Tyr267Valfs*24) | NA                          | Four affected subjects, father from French descent and mother from Algerian descents | NA                                                                               | 20/25<br>-1.25(-1.75)10°<br>20/25<br>-1.50(-2.00)165°  | NA    | Normal     | 65 central degrees with peripheral islands | UD                                                       | Optic disc drusen, normal retinal vessels, peripheral atrophic retina                                                              | Well preserved fovea                   | Hyper AF ring                           | Hyper AF Fovea | AF |
| <b>CIC064</b>                   | 50 | NA | F | Sanger Sequencing | c.1107+3A>G                | c.2387T>C                                 | NA                          | Four affected                                                                        | NA                                                                               | 20/25                                                  | NA    | Normal     | 160 degrees                                | No scotopi                                               | Normal optic disc,                                                                                                                 | Well preserved                         | Hyper AF ring                           | Hyper AF ring  |    |

|                                 |    |    |   |                   |             |                         |                          |                                                                                      |                 |                                                      |       |                               |                                                                                                  |                                                          |                                                                                                                                       |                                      |            |    |               |
|---------------------------------|----|----|---|-------------------|-------------|-------------------------|--------------------------|--------------------------------------------------------------------------------------|-----------------|------------------------------------------------------|-------|-------------------------------|--------------------------------------------------------------------------------------------------|----------------------------------------------------------|---------------------------------------------------------------------------------------------------------------------------------------|--------------------------------------|------------|----|---------------|
| <b>70</b><br><b>F2719</b>       |    |    |   | ncing             |             | p.(Met796Thr)           |                          | subjects, father from French descent and mother from Algerian descents               |                 | -2.50(-1.50)170°<br>20/20<br>-2.50(-1.50)5°          |       |                               | with crescent scotoma superiorly                                                                 | c responses, reduced and delayed cone response           | slightly narrow retinal vessels, peripheral atrophic retina entering the arcades, few BSPs in the periphery                           | fovea, thin ERM in LE                | ring       |    |               |
| <b>CIC05369</b><br><b>F2719</b> | 51 | 10 | M | NGS               | c.1107+3A>G | c.2387T>C p.(Met796Thr) | None                     | Four affected subjects, father from French descent and mother from Algerian descents | Night blindness | 20/13<br>-0.25(-0.50)85°<br>20/16<br>Plano(-0.75)90° | Clear | Tritan in RE and Normal in LE | 140 central degrees with crescent scotoma superiorly, nasally and temporally 10-30 degrees width | No scotopic responses, reduced and delayed cone response | Normal optic disc, PPA, slightly narrow retinal vessels, peripheral atrophic retina encroaching the arcades, BSPs outside the arcades | Well preserved fovea, thin ERM in BE | Hyper ring | AF | Hyper AF ring |
| <b>CIC05098</b><br><b>F2571</b> | NA | 11 | F | NGS               | c.1257+1G>A | c.1257+1G>A             | ERM peeling surgery 2005 | One affected brother, from French descent                                            | Night blindness | 20/100<br>+3.00(-1.50)175°<br>20/80<br>+3.25         | Clear | NA                            | 20 central degrees                                                                               | UD                                                       | Waxy optic disc, slightly narrowed vessels, mottled atrophic retina with BSPs in the periphery                                        | NA                                   | NA         | NA | NA            |
| <b>CIC05214</b><br><b>F2571</b> | 49 | NA | M | Sanger Sequencing | c.1257+1G>A | c.1257+1G>A             | NA                       | NA                                                                                   | NA              | 20/100<br>-1.25(-1.00)0°<br>20/66<br>-1.25(-         | IOL   | NA                            | 5 central degrees                                                                                | UD                                                       | Waxy optic disc, macular atrophy, dense BSPs outside the arcades                                                                      | NA                                   | NA         | NA | NA            |

|                                |    |    |   |                          |                            |                            |                  |                                                       |                                           |                                                                |      |                |                       |    |                                                                                                                                              |                                                            |                                                                            |    |
|--------------------------------|----|----|---|--------------------------|----------------------------|----------------------------|------------------|-------------------------------------------------------|-------------------------------------------|----------------------------------------------------------------|------|----------------|-----------------------|----|----------------------------------------------------------------------------------------------------------------------------------------------|------------------------------------------------------------|----------------------------------------------------------------------------|----|
|                                |    |    |   |                          |                            |                            |                  |                                                       |                                           | 0.50)160°                                                      |      |                |                       |    |                                                                                                                                              |                                                            |                                                                            |    |
| <b>CIC039<br/>38<br/>F1808</b> | 33 | 33 | F | NGS                      | c.1655G>A<br>p.(Arg552Gln) | c.1107+3A>G                | None             | One<br>affected<br>sister, from<br>Turkish<br>descent | Night<br>blindness                        | 20/40<br>-0.50(-<br>0.50)180°<br>20/40<br>-0.50(-<br>0.25)30°  | PSCC | Normal         | NA                    | UD | Normal<br>optic disc,<br>narrow<br>blood<br>vessels,<br>retinal<br>atrophy few<br>BSPs                                                       | Preserved<br>outer<br>retina,<br>ERM                       | Hyper<br>ring, foveal<br>hyper<br>AF<br>dots due to<br>AF<br>CME           | NA |
| <b>CIC042<br/>37<br/>F2022</b> | 31 | NA | F | Sanger<br>Seque<br>ncing | c.1655G>A<br>p.(Arg552Gln) | c.1107+3A>G                | Asthma           | One<br>affected<br>sister, from<br>Turkish<br>descent | Night<br>blindness                        | 20/32<br>-0.75<br>20/32<br>-1.00                               | PSCC | NA             | NA                    | UD | Normal<br>optic disc,<br>subtle RPE<br>changes in<br>the<br>periphery                                                                        | Well<br>preserved<br>outer<br>retina                       | Hyper<br>ring AF                                                           | NA |
| <b>CIC064<br/>59<br/>F3440</b> | 63 | 40 | F | NGS                      | c.1678C>T<br>p.(Arg560Cys) | c.1726G>A<br>p.(Gly576Ser) | Hyperte<br>nsion | One<br>affected<br>sister, from<br>French<br>descent  | Night<br>blindness,<br>constrict<br>ed VF | 20/250<br>Plano(-<br>1.5)85°<br>20/330<br>+1.00(-<br>1.25)160° | NA   | Tritan<br>axis | 20 central<br>degrees | UD | RE asteroid<br>hyalosis,<br>well<br>colored,<br>normal<br>optic disc,<br>peripheral<br>retinal<br>atrophy,<br>BSPs<br>outside the<br>arcades | CME,<br>abnormal<br>hyper-<br>reflective<br>bands          | Hyper<br>due to AF<br>cyst,<br>patched<br>of<br>AF<br>the<br>macula        | NA |
| <b>CIC064<br/>60<br/>F3440</b> | 63 | 45 | F | Sanger<br>Seque<br>ncing | c.1678C>T<br>p.(Arg560Cys) | c.1726G>A<br>p.(Gly576Ser) | None             | One<br>affected<br>sister, from<br>French<br>descent  | Night<br>blindness                        | 20/40<br>+3.00(-<br>1.25)5°<br>20/40<br>+2.75(-2)70°           | NA   | NA             | NA                    | UD | Waxy optic<br>disc,<br>narrowed<br>blood<br>vessels,<br>mottled<br>atrophic<br>retina with<br>few BSPs                                       | CME,<br>ERM,<br>relatively<br>preserved<br>outer<br>retina | Faint hyper<br>AF fovea<br>with hyper<br>AF dots<br>inside due to<br>cysts | NA |



BCVA: best corrected visual acuity; BSPs: Bone-spicule like pigmentations; CME: cystoid macular edema; ERM: epiretinal membrane; IRF: intra retinal fluid; UD: not detectable; AF: autofluorescence; RE: right eye; LE: left eye; IOL: intra ocular lens; CF: counting fingers; HM: hand motion; LP: light perception; PPA: Peripapillary atrophy; PSSC- posterior subcapsular cataract; PCO: Posterior capsular opacification; RP: retinitis pigmentosa; ONL: Outer Nuclear Layer, EZ: Ellipsoid zone, NA- not available.

**eTable 7. BCVA, VF and Imaging Data From Both Eyes of the Patients in Both Genetic Cohorts.** All data are presented as mean ± standard deviation. The difference between eyes is calculated as LE minus RE.

|                                                                                    | PDE6A                  |                  |                  |                 |                   |         | PDE6B                  |                   |                   |                 |                   |        |
|------------------------------------------------------------------------------------|------------------------|------------------|------------------|-----------------|-------------------|---------|------------------------|-------------------|-------------------|-----------------|-------------------|--------|
|                                                                                    | Number of observations | Right Eye        | Left Eye         | Mean difference | (95% CI interval) |         | Number of observations | Right Eye         | Left Eye          | Mean difference | (95% CI interval) |        |
|                                                                                    |                        |                  |                  |                 | Lower             | Upper   |                        |                   |                   |                 | Lower             | Upper  |
| <b>BCVA at first visit (logMAR)</b>                                                | 19                     | 0,29 ± 0,34      | 0,42 ± 0,91      | 0,14            | -1,64             | 1,92    | 33                     | 0,37 ± 0,37       | 0,44 ± 0,6        | 0,07            | -1,15             | 1,3    |
| <b>VF at first visit (degrees of field)</b>                                        | 15                     | 14,27 ± 6,91     | 14,4 ± 7,44      | 0,13            | -3,56             | 3,83    | 22                     | 13,18 ± 6,82      | 13,36 ± 7,15      | 0,18            | -6,62             | 6,99   |
| <b>Estimation of rate of change in BCVA (mean regression slope)</b>                | 17                     | 0,03 ± 0,12      | 0,04 ± 0,12      | 0,006           | -0,2              | 0,21    | 22                     | 0,03 ± 0,05       | 0,02 ± 0,08       | -0,006          | -0,12             | 0,11   |
| <b>Estimation of rate of change in VF (mean regression slope)</b>                  | 10                     | -1,35 ± 1,7      | -1,01 ± 1,8      | 0,34            | -1,57             | 1,91    | 11                     | -0,73 ± 1,05      | -0,74 ± 0,75      | -0,01           | -1,1              | 1,07   |
| <b>Preserved EZ on OCT (µm)</b>                                                    | 10                     |                  |                  |                 |                   |         | 16                     |                   |                   |                 |                   |        |
| <b>Horizontal diameter</b>                                                         |                        | 2339.5 ± 931.8   | 2236 ± 911.76    | -103,5          | -368,9            | 161,93  |                        | 2197.5 ± 958.4    | 2177.81 ± 972.13  | -19,75          | -411,14           | 371,64 |
| <b>Vertical diameter</b>                                                           |                        | 1874.8 ± 765.8   | 1873.1 ± 700.135 | -1,7            | -206,79           | 203,39  |                        | 1683 ± 811.28     | 1713.25 ± 867.85  | 30,18           | -386,86           | 447,24 |
| <b>SWAF Ring (µm)</b>                                                              | 10                     |                  |                  |                 |                   |         | 16                     |                   |                   |                 |                   |        |
| <b>Horizontal diameter</b>                                                         |                        | 2189.1 ± 1054.02 | 2131.8 ± 1122.04 | -57,3           | -489,105          | 374,5   |                        | 2070.94 ± 1061.99 | 2171.63 ± 1099.26 | 100,688         | -420,89           | 622,27 |
| <b>Vertical diameter</b>                                                           |                        | 1731.5 ± 759.141 | 1711.4 ± 802.29  | -20,1           | -204,83           | 164,63  |                        | 1636.31 ± 902.43  | 1654.38 ± 816.788 | 18,06           | -373,59           | 409,71 |
| <b>NIRAF Ring (µm)</b>                                                             | 10                     |                  |                  |                 |                   |         | 16                     |                   |                   |                 |                   |        |
| <b>Horizontal diameter</b>                                                         |                        | 2542.9 ± 1284.6  | 2432.4 ± 1194.2  | -99,4           | -449,33           | 250,5   |                        | 2395.31 ± 348.16  | 2507.63 ± 1088.86 | 112,31          | -528,54           | 753,16 |
| <b>Vertical diameter</b>                                                           |                        | 1984.4 ± 958.99  | 1989.4 ± 928.98  | 4,5             | -246,8            | 255,8   |                        | 1964.19 ± 899.58  | 2963.56 ± 867.76  | -0,625          | -575,65           | 574,39 |
| <b>Estimation of rate of change in preserved EZ on OCT (mean regression slope)</b> | 8                      |                  |                  |                 |                   |         | 11                     |                   |                   |                 |                   |        |
| <b>Horizontal diameter</b>                                                         |                        | -79.27 ± 49.33   | -32.46 ± 32.6    | 46.81           | -41.36            | 134.99  |                        | -86.01 ± 64.62    | -76.97 ± 46.05    | 9.03            | -62.25            | 80.33  |
| <b>Vertical diameter</b>                                                           |                        | -29.21 ± 26.88   | -24.63 ± 26.3    | 4.58            | -48.27            | 57.43   |                        | -49.84 ± 32.68    | -42.47 ± 40.57    | 7.37            | -54.93            | 69.69  |
| <b>Estimation of rate of change in SWAF ring (mean regression slope)</b>           | 8                      |                  |                  |                 |                   |         | 11                     |                   |                   |                 |                   |        |
| <b>Horizontal diameter</b>                                                         |                        | -68.32 ± 64.1    | -34.02 ± 31.9    | 34.29           | -91.54            | 160.136 |                        | -64.57 ± 31.56    | -82.22 ± 54.55    | -17.64          | -113.66           | 78.39  |
| <b>Vertical diameter</b>                                                           |                        | -45.89 ± 24.38   | -34.49 ± 29.55   | 11.39           | -21.98            | 44.76   |                        | -49.93 ± 38.08    | -46.04 ± 37.07    | 3.89            | -91.6             | 99     |

|                                                                           |   |                |                |       |        |        |    |                 |               |        |        |       |
|---------------------------------------------------------------------------|---|----------------|----------------|-------|--------|--------|----|-----------------|---------------|--------|--------|-------|
| <b>Estimation of rate of change in NIRAF ring (mean regression slope)</b> | 8 |                |                |       |        |        | 11 |                 |               |        |        |       |
| <b>Horizontal diameter</b>                                                |   | -75.19 ± 37.6  | -42.44 ± 37.97 | 32.75 | -40.77 | 106.27 |    | -83.44 ± 59.127 | -94.6 ± 61.63 | -11.15 | -59.47 | 37.16 |
| <b>Vertical diameter</b>                                                  |   | -43.73 ± 37.08 | -56.03 ± 40.79 | -12.3 | -95.82 | 71.21  |    | -58.59 ± 37.37  | -57.73 ± 35.1 | 0.86   | -92.04 | 93.77 |

CI: confidence interval.

## eReferences

1. MejeCase C, Laurent-Coriat C, Mayer C, et al. Identification of a Novel Homozygous Nonsense Mutation Confirms the Implication of GNAT1 in Rod-Cone Dystrophy. *PloS one*. 2016;11(12):e0168271.
2. Holladay JT. Proper method for calculating average visual acuity. *Journal of refractive surgery*. 1997;13(4):388-391.
3. Dryja TP, Rucinski DE, Chen SH, Berson EL. Frequency of mutations in the gene encoding the alpha subunit of rod cGMP-phosphodiesterase in autosomal recessive retinitis pigmentosa. *Investigative ophthalmology & visual science*. 1999;40(8):1859-1865.
4. Yang L, Cui H, Yin X, et al. Dependable and Efficient Clinical Molecular Diagnosis of Chinese RP Patient with Targeted Exon Sequencing. *PloS one*. 2015;10(10):e0140684.
5. Huang SH, Pittler SJ, Huang X, Oliveira L, Berson EL, Dryja TP. Autosomal recessive retinitis pigmentosa caused by mutations in the alpha subunit of rod cGMP phosphodiesterase. *Nature genetics*. 1995;11(4):468-471.
6. Wang X, Wang H, Sun V, et al. Comprehensive molecular diagnosis of 179 Leber congenital amaurosis and juvenile retinitis pigmentosa patients by targeted next generation sequencing. *Journal of medical genetics*. 2013;50(10):674-688.
7. Xu Y, Guan L, Shen T, et al. Mutations of 60 known causative genes in 157 families with retinitis pigmentosa based on exome sequencing. *Hum Genet*. 2014;133(10):1255-1271.
8. Neveling K, Collin RW, Gilissen C, et al. Next-generation genetic testing for retinitis pigmentosa. *Human mutation*. 2012;33(6):963-972.
9. Schorderet DF, Iouranova A, Favez T, Tiab L, Escher P. IROme, a new high-throughput molecular tool for the diagnosis of inherited retinal dystrophies. *BioMed research international*. 2013;2013:198089.
10. Vincent AL, Abeysekera N, van Bysterveldt KA, et al. Next-generation sequencing targeted disease panel in rod-cone retinal dystrophies in Maori and Polynesian reveals novel changes and a common founder mutation. *Clinical & experimental ophthalmology*. 2017;45(9):901-910.
11. McLaughlin ME, Sandberg MA, Berson EL, Dryja TP. Recessive mutations in the gene encoding the beta-subunit of rod phosphodiesterase in patients with retinitis pigmentosa. *Nature genetics*. 1993;4(2):130-134.
12. Farwell KD, Shahmirzadi L, El-Khechen D, et al. Enhanced utility of family-centered diagnostic exome sequencing with inheritance model-based analysis: results from 500 unselected families with undiagnosed genetic conditions. *Genetics in medicine : official journal of the American College of Medical Genetics*. 2015;17(7):578-586.
13. Valverde D, Baiget M, Seminago R, et al. Identification of a novel R552O mutation in exon 13 of the beta-subunit of rod phosphodiesterase gene in a Spanish family with autosomal recessive retinitis pigmentosa. *Hum Mutat*. 1996;8(4):393-394.
14. McLaughlin ME, Ehrhart TL, Berson EL, Dryja TP. Mutation spectrum of the gene encoding the beta subunit of rod phosphodiesterase among patients with autosomal recessive retinitis pigmentosa. *Proceedings of the National Academy of Sciences of the United States of America*. 1995;92(8):3249-3253.
15. Chang B, Hawes NL, Pardue MT, et al. Two mouse retinal degenerations caused by missense mutations in the beta-subunit of rod cGMP phosphodiesterase gene. *Vision research*. 2007;47(5):624-633.
16. Kjellstrom U, Veiga-Crespo P, Andreasson S, Ekstrom P. Increased Plasma cGMP in a Family With Autosomal Recessive Retinitis Pigmentosa Due to Homozygous Mutations in the PDE6A Gene. *Investigative ophthalmology & visual science*. 2016;57(14):6048-6057.
17. Xiong HY, Alipanahi B, Lee LJ, et al. RNA splicing. The human splicing code reveals new insights into the genetic determinants of disease. *Science*. 2015;347(6218):1254806.
18. Xu Y, Guan LP, Shen T, et al. Mutations of 60 known causative genes in 157 families with retinitis pigmentosa based on exome sequencing. *Hum Genet*. 2014;133(10):1255-1271.
19. Mclaughlin ME, Sandberg MA, Berson EL, Dryja TP. Recessive Mutations in the Gene Encoding the Beta-Subunit of Rod Phosphodiesterase in Patients with Retinitis-Pigmentosa. *Nature genetics*. 1993;4(2):130-134.
20. Cheng LL, Han RY, Yang FY, et al. Novel mutations in PDE6B causing human retinitis pigmentosa. *Int J Ophthalmol-Chi*. 2016;9(8):1094-1099.
21. Huang XF, Huang F, Wu KC, et al. Genotype-phenotype correlation and mutation spectrum in a large cohort of patients with inherited retinal dystrophy revealed by next-generation sequencing. *Genetics in Medicine*. 2015;17(4):271-278.
22. Mclaughlin ME, Ehrhart TL, Berson EL, Dryja TP. Mutation Spectrum of the Gene Encoding the Beta-Subunit of Rod Phosphodiesterase among Patients with Autosomal Recessive Retinitis-Pigmentosa. *P Natl Acad Sci USA*. 1995;92(8):3249-3253.
23. Pozo MG, Bravo-Gil N, Mendez-Vidal C, et al. Re-evaluation casts doubt on the pathogenicity of homozygous USH2A p.C759F. *American journal of medical genetics Part A*. 2015;167(7):1597-1600.
24. Carss KJ, Arno G, Erwood M, et al. Comprehensive Rare Variant Analysis via Whole-Genome Sequencing to Determine the Molecular Pathology of Inherited Retinal Disease. *Am J Hum Genet*. 2017;100(1):75-90.
25. Haer-Wigman L, van Zelst-Stams WA, Pfundt R, et al. Diagnostic exome sequencing in 266 Dutch patients with visual impairment. *European journal of human genetics : EJHG*. 2017;25(5):591-599.
26. Wang J, Zhang VW, Feng Y, et al. Dependable and efficient clinical utility of target capture-based deep sequencing in molecular diagnosis of retinitis pigmentosa. *Investigative ophthalmology & visual science*. 2014;55(10):6213-6223.
